# Supplementary material for: The diameter factor of aligned membranes facilitates wound healing by promoting epithelialization in an immune way
Source: PubMed Central journal article supplement — Bioact Mater. 2021 Sep 24;11:206–17. doi: 10.1016/j.bioactmat.2021.09.022 (PMC8665262; doi:10.1016/j.bioactmat.2021.09.022), 2021-09-24
Supplement: mmc1.pdf [file mmc1.pdf]

1 **The Diameter Factor of Aligned Membranes Facilitates Wound Healing by**  
2 **Promoting Epithelialization in an Immune Way**

3 Chenbing Wang<sup>1,4</sup>; Chenyu Chu<sup>1,4</sup>; Xiwen Zhao<sup>1,4</sup>; Yang Yang<sup>1</sup>; Chen Hu<sup>1</sup>; Li Liu<sup>3</sup>, Jidong Li<sup>2</sup>, Yili Qu<sup>1</sup>, Yi  
4 Man<sup>\*</sup>

5 *1. Department of Oral Implantology & National Clinical Research Center for Oral Diseases & State Key Laboratory of Oral*  
6 *Diseases, West China Hospital of Stomatology, Sichuan University, Chengdu, China*

7 *2. Research Center for Nano-Biomaterials, Analytical and Testing Center, Sichuan University, Chengdu 610064, China.*

8 *3. State Key Laboratory of Biotherapy, West China Hospital, Sichuan University, Collaborative Innovation Center for*  
9 *Biotherapy, Chengdu, Sichuan 610041, China*

10 *4. These authors contributed equally to this work.*

11 *\* Corresponding to Professor. Chair. **Yi Man**, E-mail: [manyi780203@126.com](mailto:manyi780203@126.com)*

12 **Corresponding author:**

13 Yi Man, DDS, PhD

14 Professor and Chair

15 Department of Oral Implantology

16 State Key Laboratory of Oral Diseases, West China Hospital of Stomatology, Sichuan

17 University, 14#, 3rd section, Renmin South Road

18 Chengdu 610041, China

19 Tel: 0086-28-85503571

20 Fax: 0086-28-85483678

21 E-mail: [manyi780203@126.com](mailto:manyi780203@126.com)

22 **The Diameter Factor of Aligned Membranes Facilitates Wound Healing by**  
23 **Promoting Epithelialization in an Immune Way**

24 **Abstract:** Topographical properties, such as pattern and diameter, of biomaterials play  
25 important roles in influencing cell activities and manipulating the related immune response  
26 during wound healing. We prepared aligned electrospinning membranes with different  
27 fiber diameters, including  $319 \pm 100$  nm (A300),  $588 \pm 132$  nm (A600), and  $1048 \pm 130$   
28 nm (A1000), by adjusting the distance from the tip to the collector, the injection rate, and  
29 the concentration of the solution. The A300 membranes significantly improved cell  
30 proliferation and spreading and facilitated wound healing (epithelization and  
31 vascularization) with the regeneration of immature hair follicles compared to the other  
32 membranes. Transcriptomics revealed the underlying molecular mechanism that A300  
33 could promote immune-related processes towards a pro-healing direction, significantly  
34 promoting keratinocyte migration and skin wound healing. All the results indicated that  
35 wound healing requires the active participation of the immune process, and that A300 was  
36 a potential candidate for guided skin regeneration applications.

37 Key words: Aligned membranes; Diameter; Wound healing; Epithelialization; MMP12

38 **1. Introduction**

39 Skin, a superficial organ in contact with the surrounding environment, constitutes the first  
40 important guard against external hazards<sup>[1]</sup>. The inability to re-epithelialize wounded skin  
41 can contribute to dehydration, inflammation, and even mortality<sup>[2,3]</sup>. Therefore, it is very  
42 important to close the wound quickly to restore the skin barrier that is essential for the

43 survival of the organism. Regrettably, current strategies for managing large wounds are not  
44 satisfactory since they are dependent on both slow and passive healing processes<sup>[4]</sup>.  
45 Promoting skin healing with the regeneration of skin appendages, such as hair follicles  
46 (HFs), that are closely related to skin tensile strength and are an important index of skin  
47 functional healing<sup>[5]</sup> has not been truly realized<sup>[6]</sup>. Consequently, there is a growing need  
48 for exploring advanced grafts to achieve ideal re-epithelialization with appendages<sup>[7-9]</sup>.  
49 The electrospinning membrane is an ideal alternative for wound healing<sup>[10,11]</sup> because it  
50 imitates the topography and functions of the extracellular matrix (ECM)<sup>[12,13]</sup>, provides a  
51 moist environment, allows gas exchange, avoids bacterial infiltration<sup>[14]</sup>, and manipulates  
52 immune-related processes towards a pro-healing direction<sup>[15,16]</sup>. Aligned membranes have  
53 a wide range of applications in the field of wound healing<sup>[1,17,18]</sup> since they can provide a  
54 series of biochemical and physical cues for regulating cell behaviors and influencing the  
55 immune response<sup>[19]</sup>. For example, it has been reported that fibroblasts can migrate over a  
56 long distance in a highly correlated manner and at a constant speed on aligned  
57 membranes<sup>[20,21]</sup>. Aligned membranes could promote the normal differentiation and  
58 outgrowth of vascular smooth muscle cells<sup>[17,22]</sup>. Critically, previous research in our group  
59 has shown that aligned membranes have many advantages in soft tissue repair and can  
60 actively regulate the immune response<sup>[23]</sup>.  
61 Although already widely used as skin wound healing biomaterials, the inflammation  
62 resistance and mechanical properties of aligned membranes still need to be strengthened<sup>[24]</sup>  
63 before broader applications are possible. Many studies have attempted to improve the

64 mechanical properties and biological performance of aligned membranes by adjusting their  
65 microstructure, since topographical factors could affect early cell fate prior to  
66 cytokines<sup>[25,26]</sup>. In view of the fact that the ECM is composed of fibers of different sizes,  
67 from nano- to micron-scale, the diameter factor that dictates the physicochemical  
68 properties and biological performances of membranes was introduced<sup>[27]</sup>. For example,  
69 human skin fibroblasts have a well-diffused morphology, growing on membranes with 350-  
70 1100 nm fiber diameters, and the expression of the type-III collagen gene in human skin  
71 fibroblasts was significantly upregulated<sup>[28]</sup>. It was found that there was a critical minimum  
72 membrane fiber diameter (d), namely 0.97  $\mu\text{m}$ , that made the human fibroblasts develop  
73 better directionally, in contrast to membranes with  $d < 0.97 \mu\text{m}$ <sup>[29]</sup>. Additionally, membranes  
74 with small diameter fibers (about 250-300 nm) were a stronger support for dermal  
75 fibroblast proliferation than membranes composed of fibers with a diameter of about 1  
76  $\mu\text{m}$ <sup>[30]</sup>. It has been reported that biological nanofiber membranes could also induce and  
77 enhance stem cell differentiation compared to microfibers and play an important role in  
78 promoting regeneration<sup>[31-33]</sup>. Another study has revealed that the fiber diameter of  
79 membranes could affect the immune response of macrophages, especially in the early stage  
80 of inflammation, since nanofiber membranes minimize the inflammatory response relative  
81 to microfiber membranes<sup>[34]</sup> and manipulate tissue regenerative immune reactions<sup>[35]</sup>.

82 Studies involving fibroblasts and monocytes/macrophages have corroborated the positive  
83 effect of the diameter factor of aligned membranes on cell behavior. However, the results  
84 of the abovementioned studies are controversial. The specific characteristics of these

85 aligned membranes, especially which diameter interval is most suitable for tissue  
86 regeneration, need to be verified. In addition, the potential diameter-mediated mechanism  
87 of repairing tissue defects has not been explored. Here, we explore the skin defect response  
88 to aligned biosynthetic membranes with varying fiber diameters, including  $319 \pm 100$  nm  
89 (A300),  $588 \pm 132$  nm (A600), and  $1048 \pm 130$  nm (A1000)<sup>[36,37]</sup>, to develop a more suitable  
90 surface wound healing medical device for manipulating the related immune response and  
91 promoting re-epithelialization with appendages. In this comprehensive study, we also  
92 evaluate the transcriptome of rat skin wounds on the aligned membranes of varying fiber  
93 diameters to explore the potential diameter-mediated mechanism of repairing tissue defects.

## 94 **2.1. A300 improves the mechanical stability, hydrophilicity, and degradation of** 95 **aligned membranes**

96 **Topological and mechanical properties.** The workflow for evaluating physicochemical  
97 properties of aligned membranes with different diameters is summarized in **Fig.1A**. The  
98 topology and corresponding fiber diameter distributions of membranes are shown as  $319 \pm$   
99  $100$  nm (A300),  $588 \pm 132$  nm (A600), and  $1048 \pm 130$  nm (A1000) in **Fig. 1B** and **1C**.  
100 Fiber diameter differences were statistically significant ( $p < 0.05$ ), revealing that the fibers  
101 presented a homogeneously bead-less performance and a highly aligned morphology. The  
102 electrospinning parameters are shown in **Table S1**. The preliminary experiments are shown  
103 in **Fig. S1**. Based on the histogram in **Fig. 1C**, the mean diameter of the aligned fibers was  
104 reduced with the change of the distance from the tip to the collector, the injection rate, and  
105 solution parameters. The membrane was ultimately formed, collected at the roller collector

106 (2800 rpm), and covered with a piece of aluminum foil. This is mainly because the increase  
107 in the electric field promoted the stretch rate of electrospinning fibers and the decrease of  
108 poly (lactic-co-glycolic-acid) (PLGA) restrained the electrospinnability itself, resulting in  
109 electrospinning fibers with a narrower size distribution and smaller mean diameter<sup>[30]</sup>. It is  
110 typically assumed that submicron-scale bioscaffolds possess better pro-healing effects for  
111 tissue engineering, since the main advantage of submicron-scale features over micron-scale  
112 features is that they provide a larger surface area to adsorb proteins and form more adhesion  
113 sites to integrin<sup>[38,39]</sup>. The mechanical performance of aligned membranes is an important  
114 determinant for their application in wound healing, because they are expected to present  
115 suitable mechanical strength during surgery and tissue regeneration.

116 In this experiment, we evaluated the mechanical behaviors of different aligned membranes  
117 (before crosslinking) via tensile strength tests. The stress–strain curve (**Fig. 1D** and **1E**)  
118 illustrates that the tensile strength of small diameter aligned membranes (A300,  $11.95 \pm$   
119  $0.35$  MPa) was elevated compared with medium diameter (A600,  $6.80 \pm 0.49$  MPa) and  
120 large diameter (A1000,  $8.86 \pm 0.47$  MPa) membranes ( $p < 0.05$ ). Meanwhile, the strain rate  
121 of A300 ( $64.73 \pm 3.51\%$ ) is maintained a lower level (**Fig. 1F**) compared to A600 ( $101.3 \pm$   
122  $2.37\%$ ) and A1000 ( $126.2 \pm 8.01\%$ ) ( $p < 0.05$ ). The smaller diameter apparently increases  
123 the mechanical stability of aligned membranes, which could prevent scars in skin wound  
124 healing<sup>[40]</sup>. The mechanical performance of these membranes could be partially explained  
125 by the fracture process of fibers. This is primarily because membranes comprised of smaller  
126 diameter fibers have both higher strength and lower ductility<sup>[41,42]</sup>.

127 **Roughness and physicochemical properties.** As shown in **Fig. S2A-C**, the roughness of  
128 aligned membranes seems to improve with the increase of mean diameter, consistent with  
129 the abovementioned results from scanning electron microscope (SEM) studies, and are  
130 beneficial for cell adhesion and migration to some extent<sup>[43]</sup>. Nevertheless, the differences  
131 between membrane diameter groups are not statistically significant. The aligned  
132 membranes possess a high specific surface area, which provides a larger surface area for  
133 cell adhesion<sup>[11]</sup>, prevents undesirable fluid accumulation, and accommodates more facile  
134 oxygen permeation<sup>[44]</sup>. In this study, the alignment of A300 is similar to that of A600 and  
135 much better than that of A1000, indicating a potential for vascularization when using  
136 smaller diameter membranes<sup>[17]</sup> (**Fig. S2D**).

137 **Hydrophilicity and *in vitro* degradation behavior.** The hydrophilicity of the aligned  
138 membranes was investigated by water contact angle (WCA) assay. As shown in **Fig. 1G**,  
139 the A300 aligned membranes exhibit a WCA of  $58.52 \pm 5.06^\circ$ , similar to that of A600  
140 ( $54.15 \pm 2.14^\circ$ ) and less than that of A1000 ( $83.69 \pm 0.67^\circ$ ) ( $p < 0.05$ ), which demonstrates  
141 its hydrophilic behavior of aligned membranes. It has been shown that decreasing fiber  
142 diameter significantly increases the water affinity of aligned membranes. This is mainly  
143 because the high specific surface area conveniently interacts with water molecules. The  
144 morphology of a biomaterial directly dictates its hydrophilicity, ultimately determining  
145 the WCA. Apart from fiber diameter, fiber arrangement and surface roughness exert  
146 significant influence on the hydrophilicity of aligned membranes<sup>[45]</sup>. We further studied  
147 the hydrophilic behavior by evaluating the infiltration of these three groups of aligned

148 membranes. As shown in **Fig. 1H**, the A300 aligned membrane is completely wetted,  
149 marginally more than A600 ( $97.86 \pm 1.32\%$ ) and significantly more than A1000 ( $47.54 \pm$   
150  $1.81\%$ ) ( $p < 0.05$ ), consistent with the aforementioned result in the WCA assay.

151 Ideal implanted biomaterials, such as wound dressings, should have suitable mechanical  
152 strength as well as matched biodegradability. Fiber degradation gradually destroys the  
153 structural and functional integrity of aligned membranes and provides the space and  
154 nutrients for new tissue ingrowth. In order to evaluate the degradability of the membranes  
155 *in vitro*, we monitored the remaining mass during the immersion process. As shown in  
156 **Fig. 1I**, the mass remaining from A300 membranes is significantly smaller than those of  
157 the others both on day 7 (A300:  $50.02 \pm 3.58\%$ , A600:  $64.65 \pm 4.64\%$ , and A1000:  $70.97$   
158  $\pm 2.73\%$ ) and on day 14 (A300:  $41.84 \pm 2.47\%$ , A600:  $57.24 \pm 3.71\%$ , and A1000:  $59.99$   
159  $\pm 2.58\%$ ) ( $p < 0.05$ ). The results show that decreasing fiber diameter accelerates the  
160 degradation process of fibers, hence advancing the degradation of aligned membranes  
161 (the degradation of membranes *in vivo* is shown in **Fig. S3A**).

## 162 **2.2. A300 promotes fibroblast proliferation and accelerates keratinocyte spreading**

### 163 **on the aligned membranes**

164 The workflow for evaluating the cell-membrane interaction of aligned membranes is  
165 summarized in **Fig. 2A**. Before clinical application as wound dressings, the different  
166 diameter aligned membranes should be assessed for performance in the ability to  
167 ameliorate related cell proliferation and/or migration. Accordingly, the proliferation of  
168 fibroblasts (L929) and human oral keratinocytes (HOK) on different diameter aligned



169 membranes was assessed, as shown in **Fig. 2B** and **2C**. For L929, the proliferation rate on  
170 A300 membranes is significantly higher than on the other membranes, except for the  
171 control group. However, there is no statistically significant difference in HOK  
172 proliferation between the membrane groups. The results indicate that the A300 membrane  
173 is more conducive for the proliferation of L929, but fiber diameter seems to have no  
174 significant influence on the proliferation of HOK<sup>[46]</sup>. It has been reported that cell  
175 proliferation on membranes is intimately related to fiber diameter and topological  
176 structure, which directly affect cell adhesion and the exchange of nutrients<sup>[28,30,34]</sup>. The  
177 fiber diameter of the aligned membranes decreased from  $1048 \pm 130$  nm to  $319 \pm 100$  nm  
178 with the change of operation and solution parameters, promoting cell adhesion and  
179 proliferation of cells on A300<sup>[47]</sup>.

180 **Viability and morphology.** In order to clarify the effect of different aligned membrane  
181 diameters on HOK, we further studied the viability and morphology of HOK using  
182 fluorescent staining with propidium iodide (PI) and SEM. As shown in **Fig. 2D** and **2E**,  
183 dead HOK on A300 aligned membranes ( $33.0 \pm 1.2$ ) is marginally less than on A600  
184 ( $34.3 \pm 1.2$ ) and A1000 ( $36.0 \pm 1.5$ ) on day 3, with no statistically significant difference.  
185 Additionally, as presented in **Fig. 2F**, SEM reveals that HOK spread on the A300 aligned  
186 membranes is much better than on A600 and A1000 on day 1. This is consistent with  
187 previous studies that showed that cells adhered to nanofibers proliferated much better  
188 than those adhered to microfibers<sup>[48]</sup>. Overall, membrane fiber diameter may have  
189 different degrees of positive effects on different types of cells, such as promoting L929

190 proliferation and accelerating HOK spread. Our results also indicate that the surface  
191 properties of aligned membranes, including diameter, wettability, and roughness, seem to  
192 affect the biological behavior of L929 and HOK. Additionally, the biosafety of the  
193 membranes *in vivo* is shown in **Fig. S3B**. Expression of actin, fibronectin (FN), and  
194 collagen IV (Col IV) in fibroblasts is elevated in A300 compared to other groups, as  
195 shown in **Fig. S4**<sup>[49,50]</sup>.

### 196 **2.3. A300 significantly facilitates wound healing**

197 **General Situation.** The workflow for evaluating rat skin wound healing is summarized  
198 in **Fig.3A**. In practical application, the membranes utilized for wound dressings could  
199 accelerate related wound healing. Accordingly, the restoration performance of aligned  
200 membranes with different diameters was assessed on rat skin defects, as shown in **Fig. 3B**  
201 and **3C**. For rat skin defects, the residual area of the A300 group is significantly smaller  
202 than those of the others at all time points. Intriguingly, the wounds treated with A300  
203 membranes occasionally reached complete healing one or two days earlier. The  
204 macroscopic result indicates that the small fiber diameter membranes were indeed better  
205 for the reconstruction of rat skin defects, consistent with the *in vitro* results. We further  
206 studied wound healing by evaluating the hematoxylin and eosin (H&E) staining of tissue  
207 sections. As shown in **Fig. 3D** and **3E**, the residual gap of the A300 group ( $2.70 \pm 0.18$   
208 mm) is significantly narrower than that of the A600 ( $3.63 \pm 0.06$  mm) and the A1000  
209 ( $4.15 \pm 0.05$  mm) groups on day 7 ( $p < 0.05$ ), confirming the previous macroscopic result  
210 that rat skin defects close faster when treated with A300 aligned membranes.

211 **Foreign body response.** The performance of aligned membranes is built on the  
212 compatible interaction between the membrane and the host immune defense system<sup>[51]</sup>,  
213 since the immune recognition system initiates the foreign body response (FBR). The FBR  
214 comprises continuous inflammation, fibrosis (formation of a fibrous capsule), and  
215 damage to the surrounding tissue<sup>[52,53]</sup>. These unwanted outcomes may destroy the  
216 function of aligned membranes and lead to pain and discomfort at the recipient site<sup>[54]</sup>. In  
217 this study, the macroscopic result of rat skin defects shows that, on day 14, better wound  
218 healing occurs and less scar tissue forms with the use of A300 membranes (**Fig. 3B**). We  
219 further investigated the thickness of fibrous capsules of rat subcutaneous implantations  
220 via Masson's trichrome staining (MST Staining) to evaluate the degree of FBR. As  
221 depicted in **Fig. 3G** and **3H**, the thickness of the fibrous capsules of the A300-treated  
222 group ( $28.40 \pm 2.38 \mu\text{m}$ ) are significantly thinner than those associated with A600 ( $43.68$   
223  $\pm 6.47 \mu\text{m}$ ) and A1000 ( $71.66 \pm 7.83 \mu\text{m}$ ) membranes, with statistically significant  
224 differences ( $p < 0.05$ ). There is minimum  $\alpha$  smooth muscle actin ( $\alpha\text{SMA}$ ) expression *in*  
225 *vivo*, as shown in **Fig. S5**. Additionally, the number of cell infiltration recruited by A300  
226 aligned membranes ( $66.00 \pm 3.79$ ) and A600 aligned membranes ( $70.67 \pm 4.33$ ) is less  
227 than that recruited by A1000 aligned membranes ( $121.0 \pm 7.37$ ) ( $p < 0.05$ ) (**Fig. 3I** and  
228 **3J**). These studies together suggest that A300 aligned membranes could be compatible  
229 with the host immune defense system and indirectly give rise to the FBR for normal  
230 healing. Other studies have shown that nanofiber scaffolds minimize the inflammatory  
231 response relative to microfiber scaffolds<sup>[34]</sup>.

232 **Vascularization.** The workflow for evaluating vascularization and epithelization is  
233 summarized in **Fig.4A**. Based on the images in **Fig. 4B** and **4C**, the results indicate that  
234 the degree of vascularization associated with A300 aligned membranes ( $0.250 \pm 0.009$   
235  $\text{mm}^2$ ) is significantly greater than that associated with A600 ( $0.125 \pm 0.002 \text{mm}^2$ ) and  
236 with A1000 ( $0.080 \pm 0.003 \text{mm}^2$ ) aligned membranes on day 7 ( $p < 0.05$ ). This is further  
237 demonstrated by the dominant IHC staining (**Fig. 4D** and **4E**) and corresponding RNA  
238 expression of CD31 in the A300 group (**Fig. 4F**).

239 **Epithelization.** Additionally, the keratinized layer of wounds appears first in A300-  
240 treated samples ( $4.78 \pm 0.08 \mu\text{m}$ ). The keratinized layer is not observed in wounds treated  
241 with the other aligned membranes even on the 7th day after operation. There is no  
242 significant difference between control and various diameter groups on day 14, whereas  
243 the thickness of the keratinized layer in A300 group is closer to that of the control group  
244 (**Fig. 3F**). This is further corroborated by immunofluorescence (IF) staining (**Fig. 4G** and  
245 **4H**) and the corresponding RNA expression of cytokeratin 5/cytokeratin 10 (K5/K10)  
246 (**Fig. 4I** and **4J**), both of which reveal that the degree of epithelization (continuity and  
247 differentiation) associated with A300 aligned membranes is significantly better than for  
248 the other groups. Also, the maximum number of newly formed (immature) hair follicles  
249 on day 14 (**Fig. 4K**) is associated with the A300 aligned membrane, demonstrating that  
250 the A300 aligned membranes achieve excellent repair results with regenerated  
251 appendages<sup>[55]</sup>. These studies show that the A300 aligned membranes increase both  
252 vascularization and epithelization, suggesting that A300 aligned membranes indeed

253 accelerated rat wound healing. However, the specific mechanism of reducing  
254 inflammation/FBR and promoting skin wound healing remains unclear.

#### 255 **2.4. MMP12 is upregulated by A300 and promotes keratinocyte migration**

256 In order to further explore the specific mechanism by which aligned membranes reduce  
257 inflammation/FBR for better wound healing, the bulk RNA sequencing of rat skin defects  
258 implanted with different diameter aligned membranes was studied via principal  
259 component analysis (PCA), Gene Ontology (GO), and Kyoto Encyclopedia of Genes and  
260 Genomes (KEGG) to screen the inflammation-related targets. The workflow for  
261 exploring the specific mechanism is summarized in **Fig.5A**. The results of PCA show that  
262 A300 is different from other diameter groups and the control (**Fig. 5B**), suggesting that  
263 the diameter factor indeed plays a vital role in wound healing. As shown in **Fig. 5C-E**,  
264 the results of top 10 in GO show that the significantly upregulated biological process  
265 (BP) items associated with A300 include primarily immune-related processes, such as  
266 *positive regulation of immune response* and *innate immune response*, relative to control  
267 and A1000 groups. However, compared with A600, the significantly upregulated BP  
268 items associated with A300 are angiogenesis- and extracellular matrix-related processes,  
269 which probably account for the smaller difference in wound healing between A300 and  
270 A600.

271 The genes of immune-related processes that display significant changes have been  
272 presented as heat maps. From the heat maps (**Fig. 5F and 5G**), we learn that the  
273 expression associated with A300 is similar to that of A600 but much stronger than that of

274 the control and A1000 in the abovementioned immune-related processes. This indicates  
275 that A300 could reduce inflammation/FBR, probably by actively regulating the immune  
276 response and achieving better wound healing. More importantly, the significantly  
277 differentially expressed matrix metalloproteinase 12 (MMP12) appears both in *positive*  
278 *regulation of immune response* and *innate immune response* of rat skin defects. Other  
279 studies have revealed that MMP12 actively regulates the migration of cells in the process  
280 of corneal wound healing<sup>[56,57]</sup>. We wondered whether MMP12 had a similar role in skin  
281 wound healing (**Fig. 5H**). For this reason, we evaluated the RNA and protein expression  
282 of MMP12 in rat skin defects implanted with different diameter aligned membranes  
283 through quantitative reverse transcription-polymerase chain reaction (qRT-PCR) and  
284 enzyme-linked immunosorbent assay (ELISA). The RNA and protein expression levels of  
285 MMP12 associated with A300 are higher than for other groups, and this difference is  
286 statistically significant (**Fig. 5I** and **5J**). The trans-well experiments show that there are  
287 more migrating and more spreading HOK in the MMP12 group than in the MMP12 plus  
288 MMP408 (inhibitor of MMP12) and in the control group. This shows that the  
289 recombinant protein MMP12 promotes the migration and spread of HOK and that  
290 MMP408 inhibits the migration and spread effects of MMP12 (**Fig. 5K-N**) and indicates  
291 that MMP12 facilitates the migration and spread of epidermal cells. Screening for the  
292 optimal concentration of MMP12 for HOK migration is shown in **Fig.S6**. Other growth  
293 factor/chemokine-induced migration experiments with no statistically significant  
294 difference, such as fibroblast migration towards PDGF (platelet-derived growth factor)-

295 BB, keratinocyte migration induced by EGF (epidermal growth factor), and THP-1 cell  
296 migration towards MCP (monocyte chemoattractant protein)-1, are shown in **Fig.S7**.

### 297 **2.5. A300 promotes macrophage polarization to reparative phenotypes**

298 The workflow for exploring the polarization of macrophages is summarized in **Fig.6A**.  
299 MMP12 is commonly considered to be predominantly expressed by macrophages<sup>[58]</sup> (**Fig.**  
300 **6B**). Phagocytosis, a process for maintaining cell homeostasis and organelle renewal, is a  
301 pivotal factor in inducing macrophages to reprogram from a pro-inflammatory phenotype  
302 to a pro-healing and pro-resolving phenotype during wound healing, as alternatively  
303 activated pathways play little role in macrophage phenotype reprogramming *in vivo*<sup>[59,60]</sup>.  
304 As shown in **Fig. 6C-E**, the results of top 10 in KEGG show that the significantly  
305 upregulated signal pathways items associated with A300, relative to control and A1000  
306 groups, include primarily *lysosome* and *phagosome*. The heat maps derived from  
307 *lysosome* and *phagocytosis* items (**Fig. 6F** and **6G**) also show genes related to phenotype  
308 transformation of macrophages. Additionally, the macrophage-related genes that  
309 displayed significant changes have been shown as heat maps. We observed that the  
310 expression of reparative macrophages associated with A300 is similar to that of A600 yet  
311 much stronger than that of the control group and A1000, according to the heat maps (**Fig.**  
312 **6H**). It has been reported that inflammatory macrophages could inhibit keratinocyte  
313 migration, which is harmful to wound healing<sup>[61,62]</sup>. The RNA expression analysis of  
314 Cd68, interleukin 10 (IL10), and transforming growth factor  $\beta$  (TGF $\beta$ ) (**Fig. 6I**) also  
315 show that the A300-treated group is significantly upregulated compared to other groups,

316 corroborating prior evidence that A300 aligned membranes indeed promote immune  
317 related processes towards a pro-healing direction. As shown in **Fig. S8**, the gene changes  
318 of reparative macrophages are more significant than that of neutrophils and T cells,  
319 indicating that reparative macrophages play a more important role than other immune  
320 cells. Based on **Fig. S9**, the expression trend of IL-10 is similar to that of Cd206,  
321 indicating that more reparative macrophages appear in the A300-treated group. Moreover,  
322 the autophagy marker microtubule-associated protein 1A/1B-light chain 3 (LC3B, IHC  
323 staining) (**Fig. 6J-K**) corroborates the above results shown in the gene heat maps. Taken  
324 altogether, the results indicate that A300 aligned membranes facilitate tissue regenerative  
325 immune reactions.

## 326 **2.6. MMP12 secreted by macrophages on A300 membranes promotes keratinocyte** 327 **migration**

328 We further explored the effect of aligned membranes on macrophages. The workflow for  
329 verifying the function of macrophages and MMP12 *in vitro* is summarized in **Fig. 7A**. The  
330 results of IF staining show that the adhesion and extension of macrophages (area/number)  
331 on A300 membranes are better than on other diameter membranes (**Fig. 7B and 7C**),  
332 suggesting that A300 manipulates the behavior of macrophages. Through the cell scratch  
333 test, it was observed that, the macrophage-conditioned medium of A300 promotes the  
334 migration of keratinocytes (**Fig. 7D and 7E**). Furthermore, the expression of MMP12 and  
335 reparative marker of macrophages is more significant in the A300-treated group (**Fig. 7F-**  
336 **H**). More importantly, the recombinant protein MMP12 could enhance the promoting



337 migration effect of macrophage-conditioned medium from the A300-treated group, while  
338 the MMP12 inhibitor could largely inhibit this effect (**Fig. 7I** and **7J**). All these results  
339 indicate that MMP12, which is secreted by macrophages, promotes keratinocyte  
340 migration.

### 341 **3. Discussion**

342 In this study, we fabricated aligned membranes with three fiber diameters (A300, A600,  
343 and A1000). The A300 membranes lead to faster wound healing and reduced FBR  
344 compared to other groups. Specifically, A300 aligned membranes enhance  
345 vascularization (increased area of new blood vessels), which is the cornerstone of wound  
346 healing. It is widely acknowledged that the newly formed blood vessels could provide the  
347 necessary nutrients necessary for accelerating wound healing<sup>[63]</sup>. The A300 membranes  
348 bring about preferable epithelization (improved maturity and integrity) with regeneration  
349 of immature HFs, which is key to wound healing. HF regeneration is one of the important  
350 indexes of functional skin healing<sup>[5]</sup>. It has been reported that HF stem cells could  
351 accelerate wound healing as well as tensile strength<sup>[64]</sup>. Additionally, the A300  
352 membranes exhibit immunomodulatory properties (**Fig. 3G-J**). Based on this evidence,  
353 we generated bulk RNA from wounded rat skin (7 d) to investigate the microenvironment  
354 around the membranes. Compared to the control group and A1000 membranes, the A300  
355 and A600 membranes significantly increase the expression of genes related to reparative  
356 macrophages (**Fig.6**). Considering that A300 has the best repair effect, we focused our  
357 attention on this fiber diameter. MMP12, predominantly expressed by macrophages<sup>[58]</sup>, is

358 significantly differentially expressed both in *positive regulation of immune response* and  
359 *innate immune response* GO items (**Fig.5**). It has been reported that TIMP (tissue  
360 inhibitor of metalloproteinase)-1 significantly reduces the migration ability of  
361 keratinocytes<sup>[61]</sup>. Another study has revealed that MMP12 actively regulates the migration  
362 of cells and protects against corneal fibrosis in the process of corneal wound healing<sup>[56,57]</sup>.  
363 We speculated that MMP12 has a similar role in skin wound healing. Through the use of  
364 a recombinant protein and an inhibitor of MMP12, we corroborated that MMP12 indeed  
365 facilitates the migration and spread of epidermal cells *in vitro* (**Fig.5** and **Fig.7**). The  
366 workflow for verifying the function of MMP12 in mice is summarized in **Fig.S10**, and it  
367 further shows that proper concentrations of MMP12 could accelerate epithelialization and  
368 achieve complete wound healing. Furthermore, small diameter aligned membranes with  
369 another composition, such as gelatin, also accelerate epithelialization and resulting  
370 wound healing compared to large diameter membranes (**Fig.S11**). We conclude that A300  
371 aligned membranes could facilitate tissue regenerative immune reactions, subsequently  
372 promoting epidermal cell migration and final wound healing.

#### 373 **4. Conclusions**

374 In the present studies, aligned membranes with different fiber diameters were  
375 successfully prepared via electrospinning, a technique that is capable of creating  
376 membranes that imitate the component and spatial structure of the skin ECM. Compared  
377 to other membranes, the A300 group enhances mechanical strength and hydrophilicity,  
378 regulates the degradation rate of the membranes as desired, and promotes cell

379 proliferation and spreading. In particular, A300 aligned membranes significantly facilitate  
380 skin wound healing (vascularization and epithelization) with HFs. Additionally,  
381 transcriptome analysis reveals the underlying molecular mechanism that A300 aligned  
382 membranes could facilitate tissue regenerative immune reactions and promote epidermal  
383 cell migration via secretion of MMP12. Taken together, we consider that wound healing  
384 requires the active participation of the immune process, and that the A300 aligned  
385 membrane is a preferable design. Therefore, A300 aligned membranes are a potential  
386 candidate for guided skin regeneration applications, particularly for re-epithelization.  
387 However, more diameter groups and regenerative immune processes still need to be  
388 investigated.

## 389 **5. Experimental section**

### 390 **5.1. Materials.**

391 Poly (lactide-co-glycolide) (PLGA, LA/GA = 75:25, MW = 105 kDa, dispersity of 1.897)  
392 was purchased from Jinan Daigang Biomaterial Co., Ltd. (Shandong, China). Fish collagen  
393 (FC) from fish scale and skin was procured from Sangon Biotech Co., Ltd. (Shanghai,  
394 China). 1,1,1,3,3,3-Hexafluoro-2-propanol (HFIP), N-hydroxysuccinimide (NHS), and 1-  
395 ethyl-3-(3-dimethylaminopropyl) carbodiimide hydrochloride (EDC) were offered by  
396 Aladdin Co., Ltd. (Shanghai, China).

### 397 **5.2. Preparation of aligned membranes with different diameters via electrospinning.**

398 To fabricate the aligned FC-reinforced PLGA electrospinning membrane (FC/PLGA) with  
399 different fiber diameters, PLGA and FC were dissolved in HFIP with stirring at 25 °C. The

400 solution was stirred vigorously until complete dissolution of PLGA and FC. Subsequently,  
401 the prepared electrospinning solutions were employed to fabricate fibrous aligned  
402 membranes with different fiber diameters via electrospinning in the following manner. The  
403 electrospinning solutions were loaded into a plastic syringe fitted with a flat-tipped 21 G  
404 stainless steel needle. A high voltage and a distance were applied between the needle and  
405 the roller collector (2800 rpm), which was covered with a piece of aluminum foil. The  
406 solution was fed at a constant speed, regulated by a precision syringe pump. The prepared  
407 membranes were dried in a vacuum oven at 25 °C until the solvent was completely  
408 volatilized, which was confirmed by the X-ray diffraction (XRD) and Fourier transform  
409 infrared spectroscopy (FTIR) spectra (**Fig. S2E and S2F**).

### 410 **5.3. Characterization.**

411 An SEM (JEOL, JSM-6510LV, Japan) was employed to observe the morphology of the  
412 aligned membranes with different diameters. In addition, Image-Pro Plus was used to  
413 quantitatively measure diameter, distribution, and alignment (orientation $<10^\circ$ )<sup>[65]</sup> from the  
414 SEM images obtained for 200 randomly selected fibers. To estimate the mechanical  
415 performance of these membranes, the samples were attached to an electronic universal  
416 testing machine (SHIMADZU, AG-IC 50 KN, Japan) with a 50-N load cell. Prior to testing,  
417 samples with thicknesses of 0.1–0.2 mm were cut into a dumbbell shape with a gauge  
418 length of 75 mm and width of 4 mm. The tensile properties of membranes were determined  
419 under a constant upper clamp speed of 5 mm/min at room temperature, in accordance with  
420 the criteria of “Plastics-Determination of tensile properties of films” (GB/T 1040.3–2006,

421 corresponding with ISO 1184–1983). The elastic modulus was calculated from the slope  
422 of the linear region ( $\epsilon = 1\text{--}3\%$ ) of the stress-strain curve. Atomic force microscopy (AFM;  
423 JEOL, JSM-6510LV, Japan) was employed to observe the roughness of the aligned  
424 membranes with different diameters. The surface wetting behavior of the membranes was  
425 characterized by measuring the water contact angles using a contact angle measuring  
426 instrument (Chengde Dingsheng, JY-82B, China) and a hydrophilicity test. Five samples  
427 were tested for each membrane group to obtain an average value.

#### 428 **5.4. *In vitro* swelling and degradability study.**

429 The aligned membranes with different diameters were immersed in a solution of 50 mM  
430 EDC/NHS and 10 mM of ethanol for 24 h at 4 °C. The membranes were washed three  
431 times with ethanol and then dried in a vacuum oven for 24 h. The dried fibrous membranes  
432 were cut into 10 mm × 10 mm squares and weighed accurately. The membrane samples  
433 were put into 5 mL plastic tubes containing 4 mL phosphate buffered saline (PBS, pH =  
434 7.4) and were put in a shaking incubator at 100 rpm and 37 °C. The incubating media were  
435 changed every week. At each predetermined time point, the samples were dried to a  
436 constant weight in a vacuum oven. The swelling and weight loss rate were calculated  
437 according to the following formula:

$$438 \quad \text{Weight remaining (\%)} = m / m_0 \times 100\%$$

439 where  $m_0$  is the mass of the membrane before incubation and  $m$  is the mass of the  
440 membrane after incubation for a set time.

#### 441 **5.5. *In vitro* cell culture experiments.**

442 **5.5.1. Cell culture.**

443 The fibroblasts (L929), human oral keratinocytes (HOK), and Thp1 were obtained from  
444 West China School of Stomatology, Sichuan University. L929, HOK, and Thp1 were  
445 cultured in modified RPMI medium (1640; Gibco, USA) supplemented with 10% fetal  
446 bovine serum (FBS, Gibco, USA) and a 1% mixture of penicillin/streptomycin (MP  
447 Biomedicals, USA). The culture medium was replaced every other day in the L929, HOK,  
448 and Thp1 culture cycle. On reaching a confluence of 80% to 90%, Thp1 was induced into  
449 macrophages with propylene glycol methyl ether acetate (PMA, 100 ng/mL). Membranes  
450 were preprocessed by immersing in a 75% ethanol solution for 30 min. Subsequently, all  
451 the prepared membranes were sterilized by  $\gamma$ -irradiation for cell experiments.

452 **5.5.2. Cell viability.**

453 L929, HOK, and Thp1 ( $1 \times 10^4$  cells/well) were seeded and incubated separately at 37 °C  
454 with 5% CO<sub>2</sub> atmosphere. One day after culturing on membranes, the macrophage  
455 supernatant was collected for follow-up experiments. At the given time points (1 d, 3 d, 5  
456 d, 7 d), the proliferation of L929 and HOK on these membranes was assessed by cell  
457 counting kit-8 (CCK-8, DOJINDO, Japan) assay. Membrane materials were not used in the  
458 control group. The optical density (OD) value was read by a 1420 Multilabel Counter  
459 (PerkinElmer, USA) at 450 nm. The dead portion of HOK was stained with propidium  
460 iodide (PI), according to the product instructions (DOJINDO, Japan). Fluorescence images  
461 were visualized with an inverted fluorescence microscope (Leica, Germany). SEM (JEOL,  
462 JSM-6510LV, Japan) was employed to observe the morphology of cells on the aligned

463 membranes. Random membrane materials were used in the control group. The  
464 macrophages were stained with phalloidin, according to product instructions (Solarbio,  
465 USA). Fluorescence images were visualized with a confocal laser scanning microscope  
466 (CLSM, Leica, Germany).

### 467 **5.5.3. Cell migration.**

468 HOK cells ( $1 \times 10^5$  cells/well) were seeded in the chamber of trans-well and 24-pore plates  
469 at 37 °C with 5% CO<sub>2</sub> atmosphere. Different stimuli, such as MMP12 (1 μL, 20 ng/mL,  
470 Biolegend, USA), MMP408 (1 μL, 20 ng/mL, Invivogen, USA) and macrophage  
471 supernatants, were added. At the given time point (2 d), HOK cells in the plates were fixed  
472 (30 min). HOK cells in the chambers of the trans-well plates were stained with crystal  
473 violet (0.1% w/v, 30 min), washed with PBS, and visualized with an inverted microscope  
474 (Leica, Germany). The HOK cells in the 24-pore plate were stained with phalloidin,  
475 according to the product instructions (Solarbio, China). Fluorescence images were  
476 visualized with a confocal laser scanning microscope (CLSM, Leica, Germany).

### 477 **5.5.4. Flow cytometry**

478 Macrophages (transformed from Thp1) were collected into EP tubes after 24 h, fixed with  
479 4% paraformaldehyde for 15 min, centrifuged and washed with PBS a total of 3 times, and  
480 blocked with 3% BSA. Macrophages were mixed with the corresponding direct labeling  
481 antibody (iNOS, ab115819, 1:200; Cd206, ab195192, 1:200) prepared in a 1% BSA  
482 solution, incubated at 4 °C for 1 h, and washed 3 times with PBS. The corresponding  
483 indicators were detected on a flow cytometer (Thermo Fisher, USA).

484 **5.6. Animal experiments.**

485 Sprague–Dawley (SD) rats, aged 8 weeks and with an average weight of  $220 \pm 20$  g  
486 (C57BL/6 mice aged 8 weeks with an average weight of 20 g used in the supplementary  
487 section), were obtained from the Experimental Animal Center of Sichuan University. All  
488 studies were approved by the Institution Review Board of West China Hospital of  
489 Stomatology (No. WCHSIRB-D-2017-033-R1). The experimental rats could access food  
490 and water at will. The health status of the rats was checked every day during the  
491 experimental period. After conventional fasting for 12 h, the rats were intraperitoneally  
492 anaesthetized in accordance with the instructions of the Animal House. After skin  
493 preparation for surgery, a circular defect with a 6 mm diameter was created on the right  
494 and left skin of the dorsum. After transplanting different diameter aligned electrospinning  
495 membranes, the skin wounds were covered with 3M™ Tegaderm™ and fixed on the latex  
496 ring with 3.0 silk suture. The experimental rats received routine postoperative nursing<sup>[66]</sup>.  
497 The experimental rats were randomly divided into four groups: skin wounds transplanted  
498 with saline (Ctr), A300 aligned membranes, A600 aligned membranes, and A1000 aligned  
499 membranes. The rats were executed by dislocation after anesthesia 5, 7, and 14 days after  
500 surgery, and tissue samples for general analysis were harvested. All tissue sections that  
501 were obtained from the rat skin wounds for routine histological examination were stained  
502 with MST Staining. The thickness of fibrous capsule was determined manually under a  
503 microscope, using 5 randomly picked fields (at 100× magnification).  
504 Immunohistochemistry (IHC) was performed for CD31 (ab182981, Abcam, 1:2000) to



505 evaluate vascularization, and for LC3B (Sigma-Aldrich, L7543, 1:200, USA) to evaluate  
506 autophagy. Double staining immunofluorescence (IF) was performed for cytokeratin 5 (K5,  
507 ab52635, Abcam, 1:200) and cytokeratin 10 (K10, ab76318, Abcam, 1:150) to evaluate  
508 keratinization. IHC results were further verified by qRT-PCR, and the data were presented  
509 as the relative quantification (RQ,  $2^{-\Delta\Delta C_t}$ ) compared to control groups (related primers are  
510 shown in **Table S2**).

### 511 **5.7. Bulk RNA sequencing.**

512 Three replicates of rat skin wounds in each group were detected for the assay of Bulk RNA  
513 sequencing (NEBNext® Ultra™ RNA Library Prep Kit for Illumina®), and the results  
514 were analyzed for GO and KEGG for screening the related targets. These results were  
515 further verified by fluorescence quantitative PCR (related primers are shown in **Table S2**)  
516 and ELISA (MEIMIAN, China).

### 517 **5.8. Statistical analysis.**

518 At least three independent assays were conducted to obtain repeatable data if not  
519 distinctively explained, and the data was dealt with Case Viewer, Origin 2019 or  
520 Graphpad Prism 8.0 software. Statistical analyses were performed by Student's t-test and  
521 the Tukey post-hoc test by analysis of variance under the condition of normal  
522 distribution. The numerical data are presented as mean  $\pm$  standard error of the mean. A  
523 value of  $p < 0.05$  was considered statistically significant ( $*p < 0.05$ ,  $**p < 0.01$ ,  $***p <$   
524  $0.001$ ).

## 525 **6. Acknowledgments**

526 This work was supported by Key R & D Projects of Sichuan Science and Technology  
527 Plan (2021YFS0030), Interdisciplinary Innovation Project, West China Hospital of  
528 Stomatology Sichuan University (RD-03-202006), and Research and Develop Program,  
529 West China Hospital of Stomatology Sichuan University (No. LCYJ2019-19).

## 530 **7. Disclosures**

531 The authors state no conflict of interest.

532

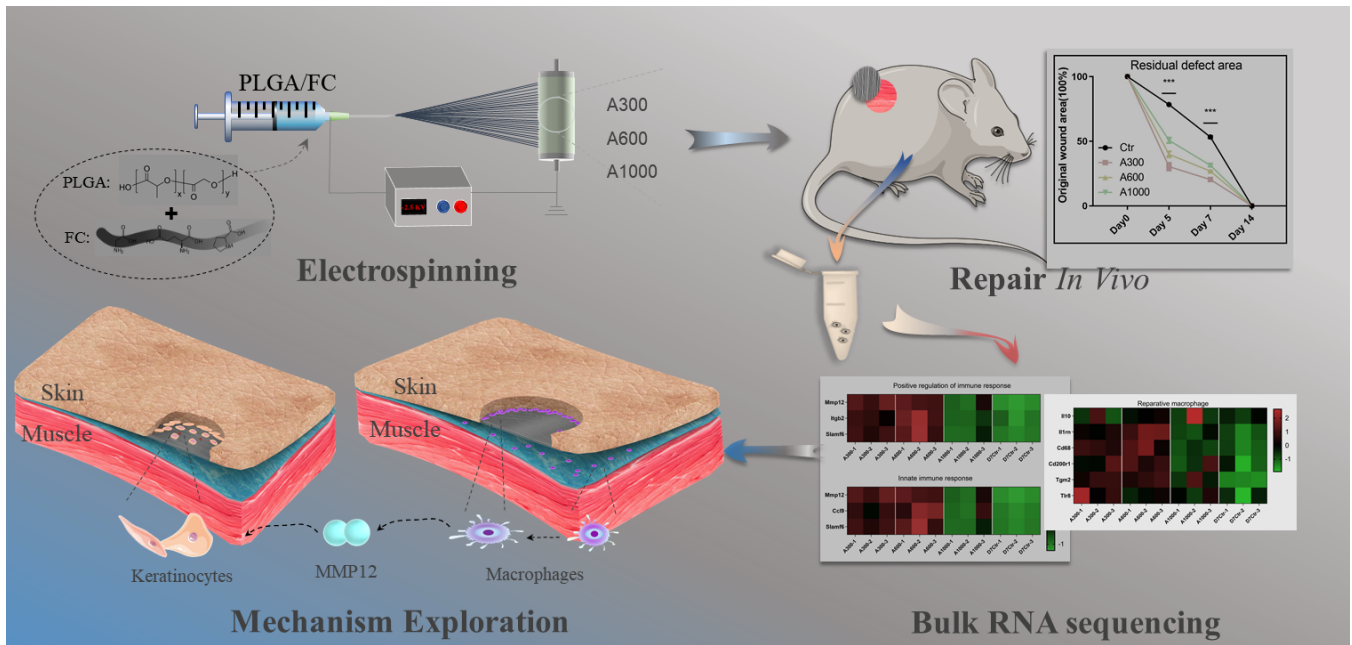

534

535

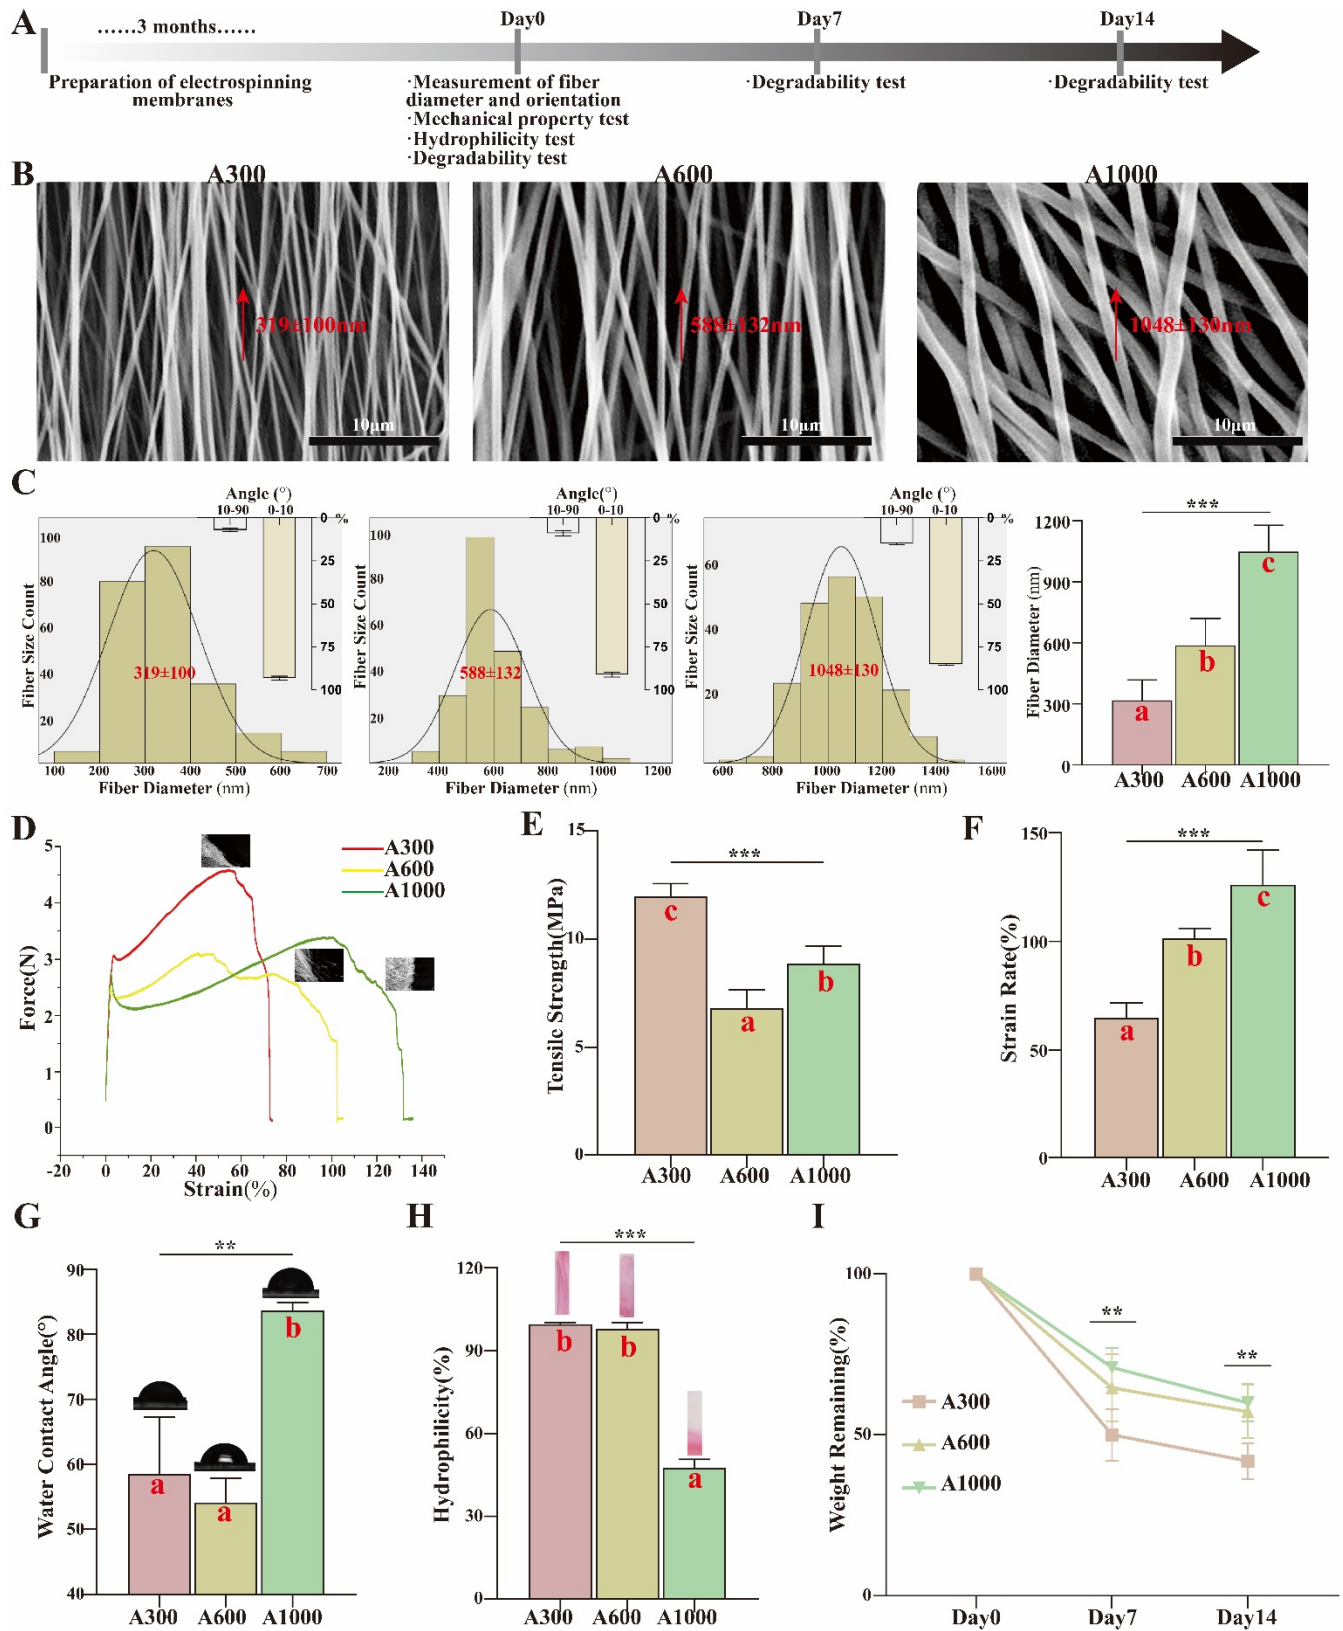

536

537

Fig. 1. (A) Workflow for evaluating physicochemical properties of electrospinning membranes; (B) SEM images and (C)

538 corresponding diameter distributions of different diameter aligned membranes; (D) Typical stress–strain curves of various  
539 membranes (parallel to aligned membranes); (E) Tensile strength; (F) Strain rate; (G) WCA images and corresponding  
540 analysis; (H) Hydrophilicity images and corresponding analysis; (I) Degradation assays. \* $p < 0.05$ , \*\* $p < 0.01$ , \*\*\* $p < 0.001$   
541 by ANOVA for data in (C), (E), (F), (G), (H), and (I). Different letters indicate significant differences.  
542

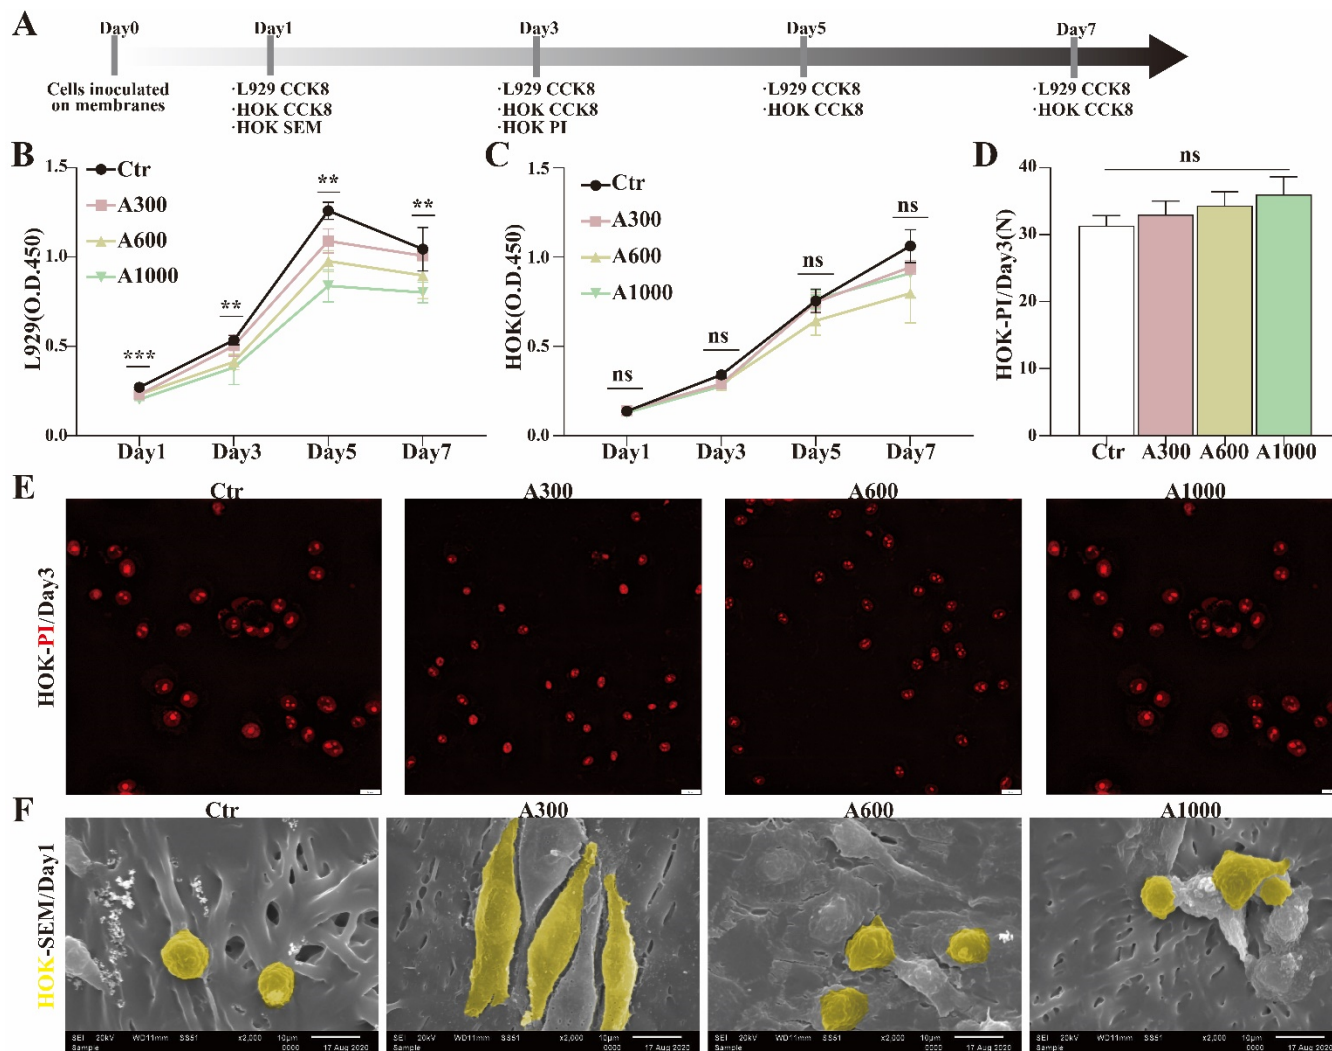

543

The yellow pseudo-color indicates that the representative morphology of HOK is in the SEM images

544 **Fig. 2.** (A) Workflow for evaluating the biocompatibility of electrospinning membranes; CCK-8 tests of (B) L929 and (C)

545 HOK; (D) Analysis and (E) corresponding images of PI fluorescent staining of HOK; (F) SEM images of HOK morphology.

546 \* $p < 0.05$ , \*\* $p < 0.01$ , \*\*\* $p < 0.001$  by ANOVA for data in (B), (C), and (D).

547

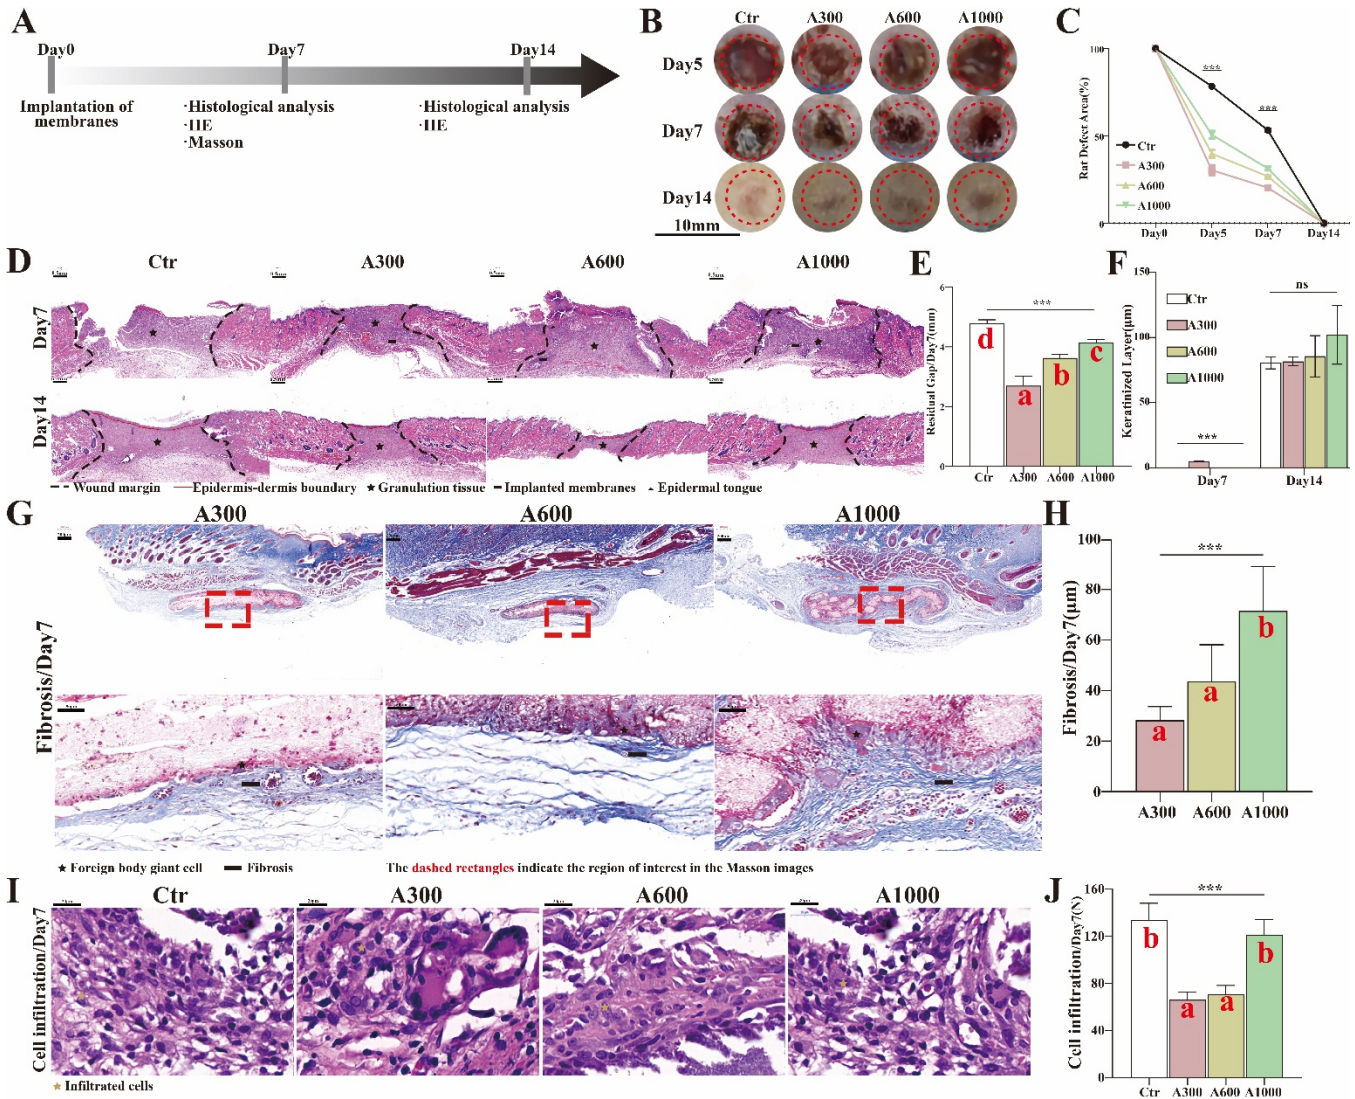

548

549 **Fig. 3.** (A) Workflow for evaluating rat skin wound healing and FBR; (B) Macroscopic images of rat skin defects and (C)  
 550 corresponding analysis; (D) Residual gap images of H&E of rat skin defects and (E) corresponding analysis; (F) The  
 551 analysis of keratinized layer images of H&E; (G) FBR images of MST Staining of rat subcutaneous implantations and (H)  
 552 corresponding analysis; (I) Cell infiltration images of H&E of rat skin defects and (J) corresponding analysis. \* $p < 0.05$ , \*\* $p$   
 553  $< 0.01$ , \*\*\* $p < 0.001$  by ANOVA for data in (C), (E), (F), (H), and (J). Different letters indicate significant differences.

554

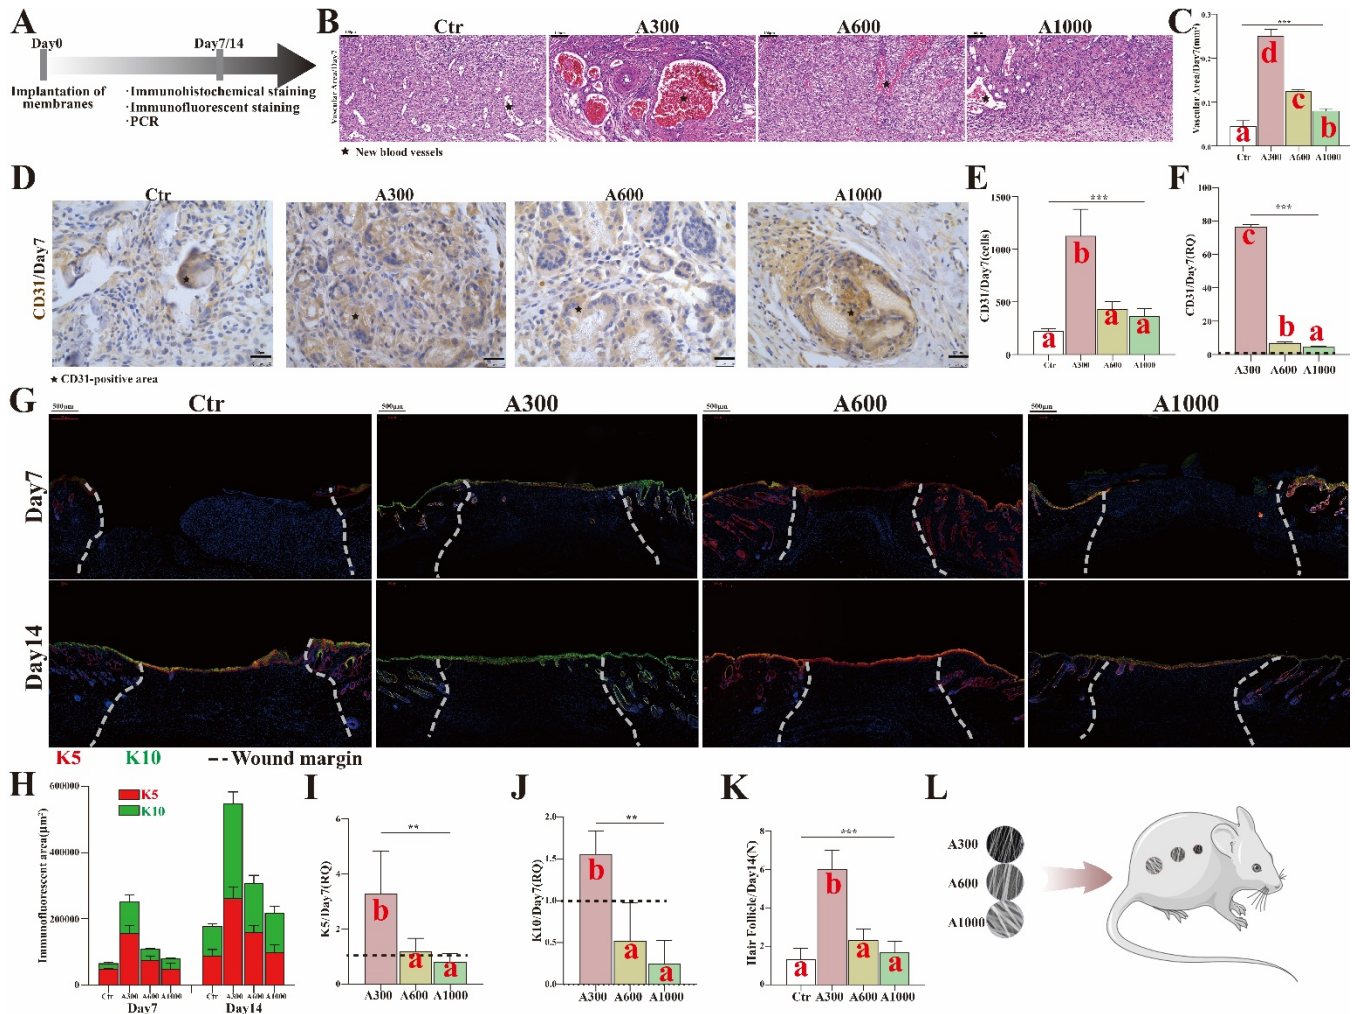

555

556 **Fig. 4.** (A) Workflow for evaluating vascularization and epithelization; (B) Vascularization images of H&E of rat skin  
 557 defects and (C) corresponding analysis; (D) CD31-positive images of IHC staining of rat skin defects and (E) corresponding  
 558 analysis; (F) RNA expression of CD31; (G) K5(red)/K10(green)-positive images of IF staining of rat skin defects and (H)  
 559 corresponding analysis; (I) RNA expression of K5; (J) RNA expression of K10; (K) The number of regenerated HF on day  
 560 14; (L) Different diameter aligned electrospinning membranes implanted on rat skin defects. \* $p < 0.05$ , \*\* $p < 0.01$ , \*\*\* $p <$   
 561  $0.001$  by ANOVA for data in (C), (E), (F), (I), (J), and (K). Different letters indicate significant differences.

562



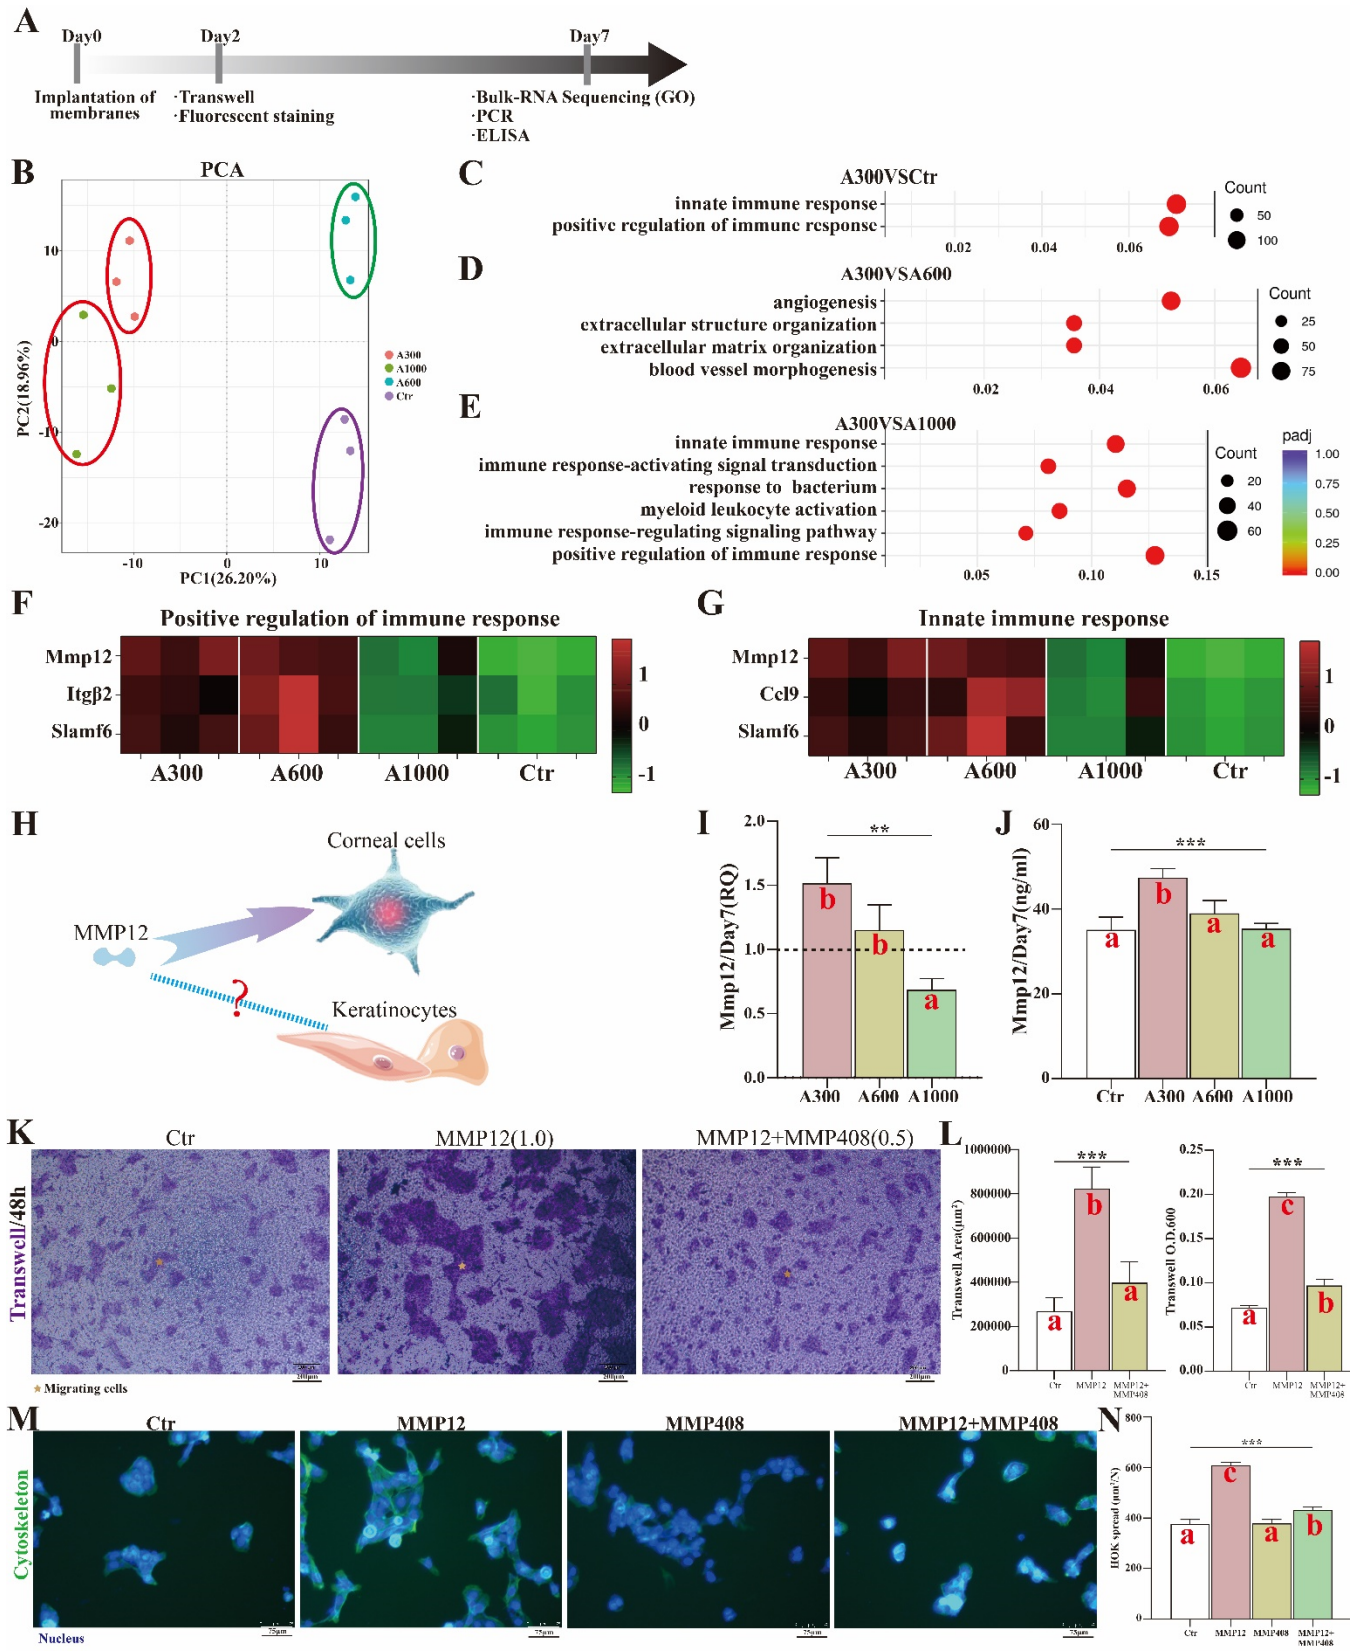

564 **Fig. 5.** (A) Workflow for exploring the function of MMP12 in rat skin defects; (B) PCA images of Bulk RNA sequencing on  
565 day 7; (C) A300VSCtr, (D) A300VSA600, and (E) A300VSA1000 of GO of Bulk RNA sequencing; (F) Heat map of *positive*  
566 *regulation of immune response*; (G) Heat map of *innate immune response*; (H) Proposed MMP12 function; (I) RNA  
567 expression of MMP12; (J) ELISA result of MMP12; (K) Trans-well assays on MMP12 promoting the migration of HOK and  
568 MMP408 inhibiting the function of MMP12 and (L) corresponding analysis; (M) Fluorescent staining of MMP12 promoting  
569 the spread of HOK and MMP408 inhibiting the function of MMP12 and (N) corresponding analysis. \* $p < 0.05$ , \*\* $p < 0.01$ ,  
570 \*\*\* $p < 0.001$  by ANOVA for data in (I), (J), (L), and (N). Different letters indicate significant differences.  
571

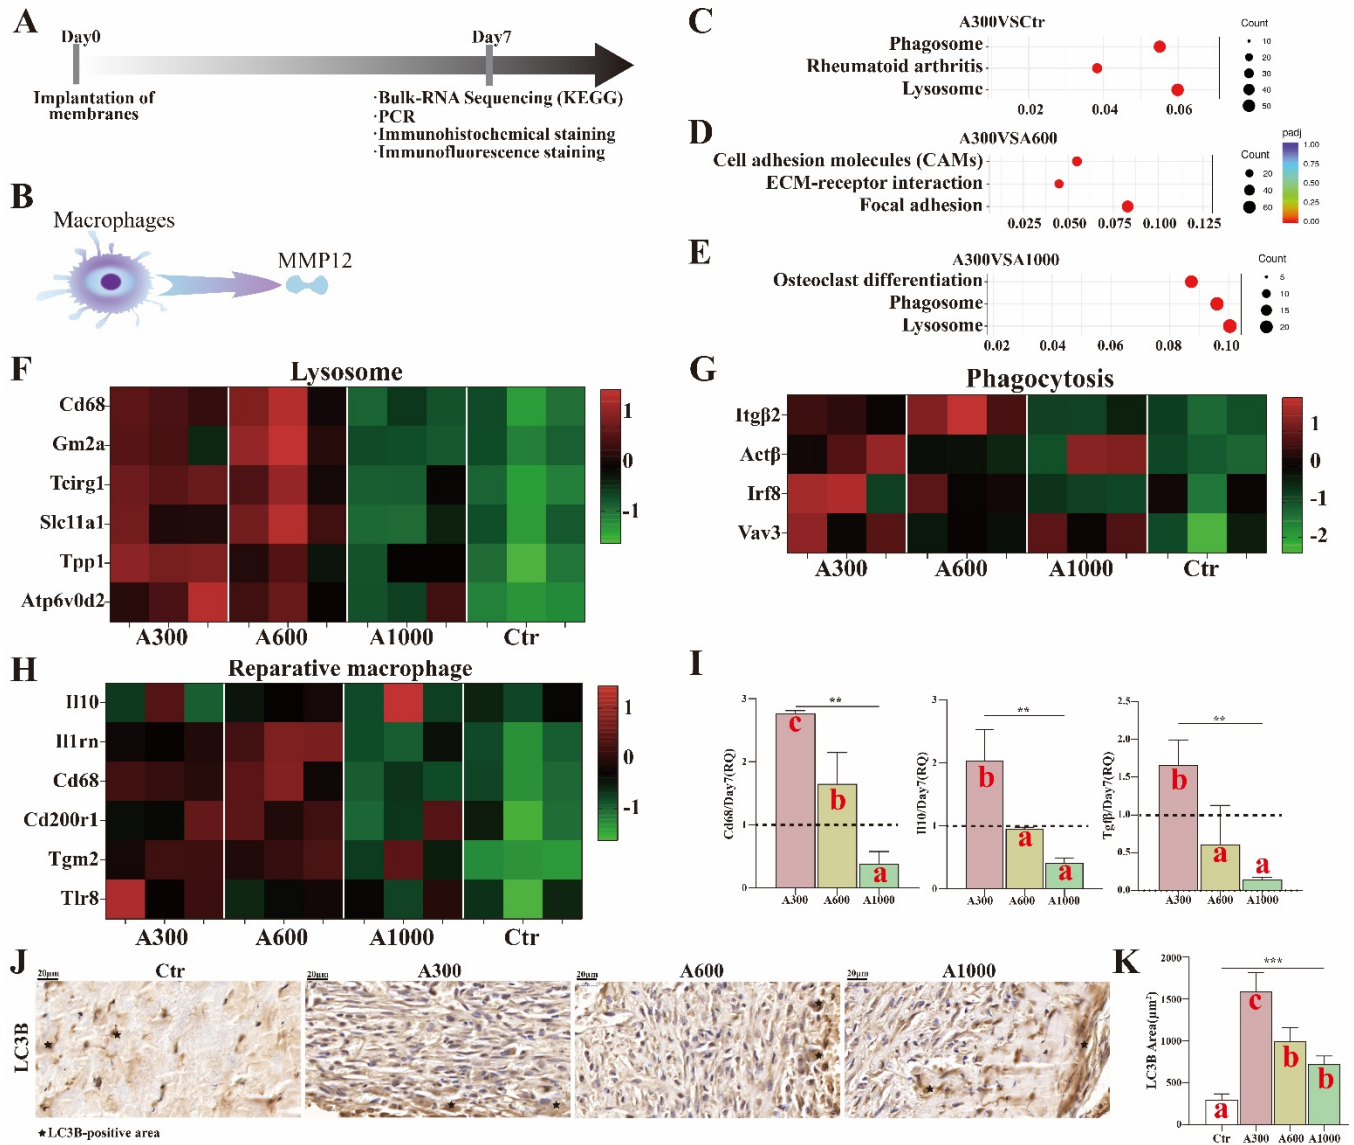

572

573 **Fig. 6.** (A) Workflow for exploring the transformation of macrophages; (B) The MMP12 secreted by macrophages;

574 (C)A300VSCtr, (D) A300VSA600, and (E)A300VSA1000 of KEGG of Bulk RNA sequencing on day 7; (F) Heat map of

575 lysosome; (G) Heat map of phagocytosis; (H) Heat map of reparative macrophages; (I) RNA expression of Cd68, IL10, and

576 TGFβ; (J) LC3B-positive images of IHC staining of rat skin defects and (K) corresponding analysis. \* $p < 0.05$ , \*\* $p < 0.01$ ,

577 \*\*\* $p < 0.001$  by ANOVA for data in (I) and (K). Different letters indicate significant differences.

578

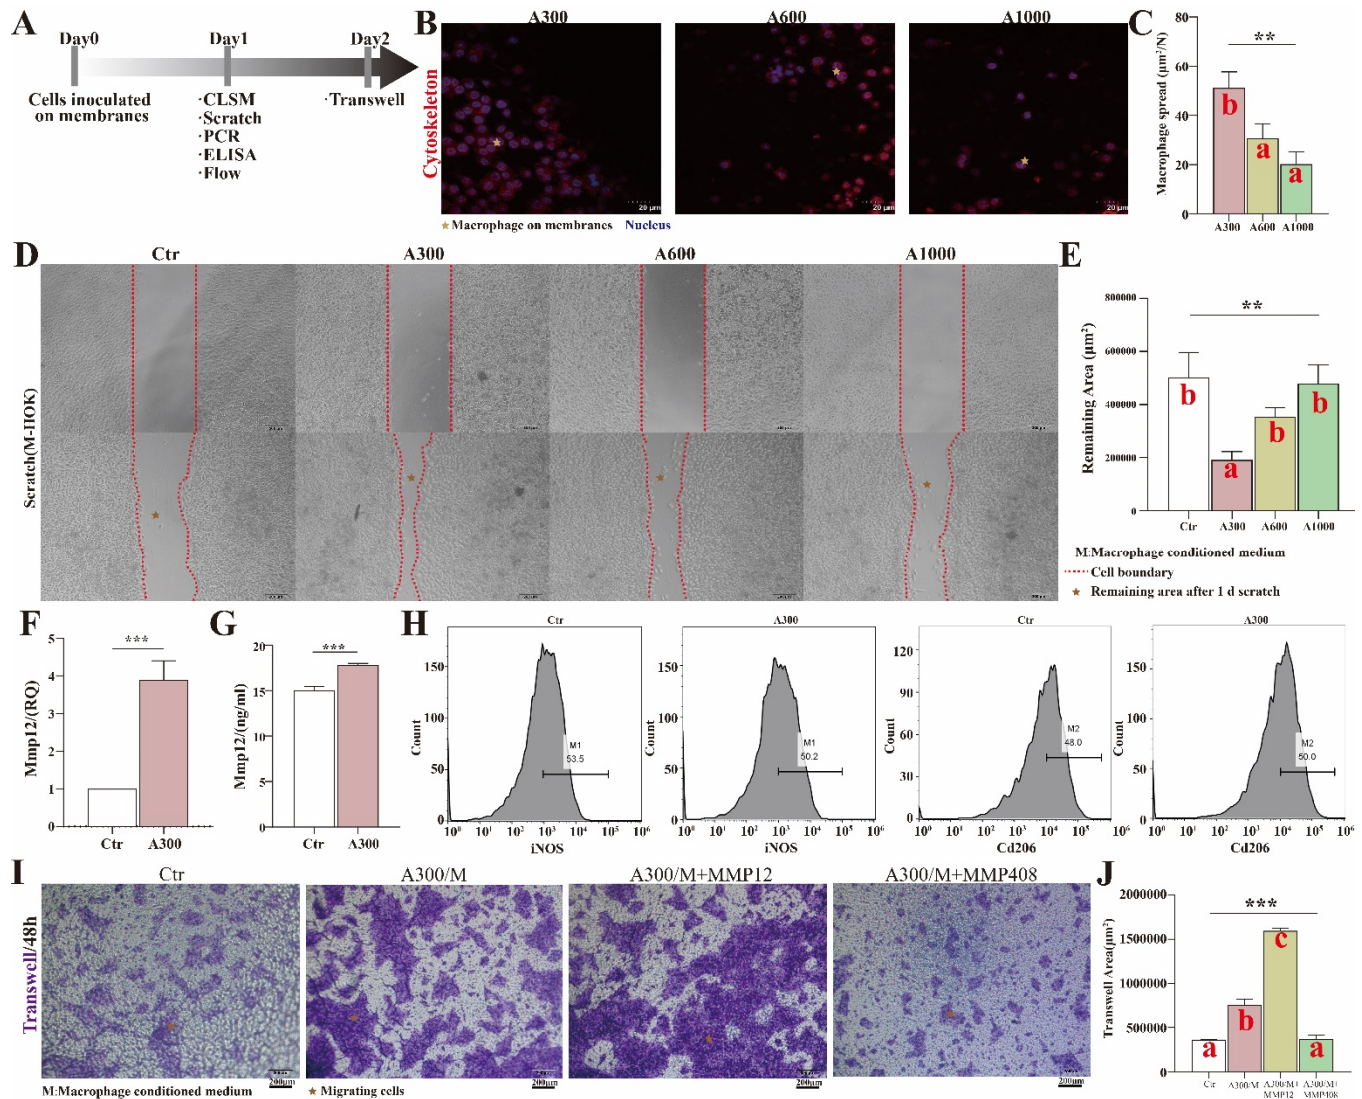

579

580

581

582

583

584

585

586

587

588

589

**Fig. 7.** (A) Workflow for verifying the function of macrophages and MMP12 *in vitro*; (B) CLSM images of macrophages (Thp1) on different diameter electrospinning membranes and (C) corresponding analysis; (D) The migration of HOK stimulated by the conditioned medium derived from macrophages inoculated on various membranes and (E) corresponding analysis; (F) RNA expression of MMP12; (G) ELISA result of MMP12; (H) Flow cytometry results of macrophages; (I) Trans-well assays and (J) corresponding analysis. \* $p < 0.05$ , \*\* $p < 0.01$ , \*\*\* $p < 0.001$  by ANOVA for data in (C), (E), (F), (G), and (J). Different letters indicate significant differences.

## 590 **References**

- 591 [1] Amirsadeghi A, Jafari A, Eggermont L J, et al. Vascularization strategies for skin tissue engineering[J]. *Biomater Sci*, 2020,  
592 8(15): 4073-4094.
- 593 [2] Zhao Y, Li Z, Song S, et al. Skin - Inspired Antibacterial Conductive Hydrogels for Epidermal Sensors and Diabetic Foot  
594 Wound Dressings[J]. *Advanced Functional Materials*, 2019, 29.
- 595 [3] Sen C K, Gordillo G M, Roy S, et al. Human skin wounds: a major and snowballing threat to public health and the economy[J].  
596 *Wound Repair Regen*, 2009, 17(6): 763-71.
- 597 [4] Blacklow S O, Li J, Freedman B R, et al. Bioinspired mechanically active adhesive dressings to accelerate wound closure[J].  
598 *Sci Adv*, 2019, 5(7): eaaw3963.
- 599 [5] Mascharak S, Desjardins-Park H E, Davitt M F, et al. Preventing Engrailed-1 activation in fibroblasts yields wound  
600 regeneration without scarring[J]. *Science*, 2021, 372(6540).
- 601 [6] Savojo H, Godau B, Hassani M S, et al. Skin Tissue Substitutes and Biomaterial Risk Assessment and Testing[J]. *Front Bioeng*  
602 *Biotechnol*, 2018, 6: 86.
- 603 [7] Wang P H, Huang B S, Horng H C, et al. Wound healing[J]. *J Chin Med Assoc*, 2018, 81(2): 94-101.
- 604 [8] Cui L, Liang J, Liu H, et al. Nanomaterials for Angiogenesis in Skin Tissue Engineering[J]. *Tissue Eng Part B Rev*, 2020, 26(3):  
605 203-216.
- 606 [9] Larouche J, Sheoran S, Maruyama K, et al. Immune Regulation of Skin Wound Healing: Mechanisms and Novel Therapeutic  
607 Targets[J]. *Adv Wound Care (New Rochelle)*, 2018, 7(7): 209-231.
- 608 [10] Juncos Bombin A D, Dunne N J, Mccarthy H O. Electrospinning of natural polymers for the production of nanofibres for  
609 wound healing applications[J]. *Mater Sci Eng C Mater Biol Appl*, 2020, 114: 110994.
- 610 [11] Kishan A P, Cosgriff-Hernandez E M. Recent advancements in electrospinning design for tissue engineering applications:  
611 A review[J]. *J Biomed Mater Res A*, 2017, 105(10): 2892-2905.
- 612 [12] Friedl P, Wolf K. Plasticity of cell migration: a multiscale tuning model[J]. *J Cell Biol*, 2010, 188(1): 11-9.
- 613 [13] Scadden D T. Nice neighborhood: emerging concepts of the stem cell niche[J]. *Cell*, 2014, 157(1): 41-50.
- 614 [14] Miguel S P, Figueira D R, Simões D, et al. Electrospun polymeric nanofibres as wound dressings: A review[J]. *Colloids Surf*  
615 *B Biointerfaces*, 2018, 169: 60-71.
- 616 [15] Dellacherie M O, Seo B R, Mooney D J. Macroscale biomaterials strategies for local immunomodulation[J]. *Nature Reviews*  
617 *Materials*, 2019, 4(6): 379-397.
- 618 [16] Sadtler K, Singh A, Wolf M T, et al. Design, clinical translation and immunological response of biomaterials in regenerative  
619 medicine[J]. *Nature Reviews Materials*, 2016, 1(7): 16040.
- 620 [17] Wang Y, Shi H, Qiao J, et al. Electrospun tubular scaffold with circumferentially aligned nanofibers for regulating smooth  
621 muscle cell growth[J]. *ACS Appl Mater Interfaces*, 2014, 6(4): 2958-62.
- 622 [18] Nour S, Imani R, Chaudhry G R, et al. Skin wound healing assisted by angiogenic targeted tissue engineering: A  
623 comprehensive review of bioengineered approaches[J]. *J Biomed Mater Res A*, 2020.
- 624 [19] Doyle A D, Carvajal N, Jin A, et al. Local 3D matrix microenvironment regulates cell migration through spatiotemporal  
625 dynamics of contractility-dependent adhesions[J]. *Nat Commun*, 2015, 6: 8720.
- 626 [20] Liu Y, Franco A, Huang L, et al. Control of cell migration in two and three dimensions using substrate morphology[J]. *Exp*  
627 *Cell Res*, 2009, 315(15): 2544-57.
- 628 [21] Xie J, Macewan M R, Ray W Z, et al. Radially aligned, electrospun nanofibers as dural substitutes for wound closure and  
629 tissue regeneration applications[J]. *ACS Nano*, 2010, 4(9): 5027-36.

630 [22] Alford P W, Nesmith A P, Seywerd J N, et al. Vascular smooth muscle contractility depends on cell shape[J]. Integr Biol  
631 (Camb), 2011, 3(11): 1063-70.

632 [23] Hu C, Chu C, Liu L, et al. Dissecting the microenvironment around biosynthetic scaffolds in murine skin wound healing[J].  
633 Science Advances, 2021, 7(22): eabf0787.

634 [24] Abrigo M, Mcarthur S L, Kingshott P. Electrospun nanofibers as dressings for chronic wound care: advances, challenges,  
635 and future prospects[J]. Macromol Biosci, 2014, 14(6): 772-92.

636 [25] Mcbeath R, Pirone D M, Nelson C M, et al. Cell shape, cytoskeletal tension, and RhoA regulate stem cell lineage  
637 commitment[J]. Dev Cell, 2004, 6(4): 483-95.

638 [26] Xie J, Shen H, Yuan G, et al. The effects of alignment and diameter of electrospun fibers on the cellular behaviors and  
639 osteogenesis of BMSCs[J]. Mater Sci Eng C Mater Biol Appl, 2021, 120: 111787.

640 [27] Jafari A, Amirsadeghi A, Hassanajili S, et al. Bioactive antibacterial bilayer PCL/gelatin nanofibrous scaffold promotes full-  
641 thickness wound healing[J]. Int J Pharm, 2020, 583: 119413.

642 [28] Kumbar S G, Nukavarapu S P, James R, et al. Electrospun poly(lactic acid-co-glycolic acid) scaffolds for skin tissue  
643 engineering[J]. Biomaterials, 2008, 29(30): 4100-7.

644 [29] Liu Y, Ji Y, Ghosh K, et al. Effects of fiber orientation and diameter on the behavior of human dermal fibroblasts on  
645 electrospun PMMA scaffolds[J]. J Biomed Mater Res A, 2009, 90(4): 1092-106.

646 [30] Hodgkinson T, Yuan X F, Bayat A. Electrospun silk fibroin fiber diameter influences in vitro dermal fibroblast behavior and  
647 promotes healing of ex vivo wound models[J]. J Tissue Eng, 2014, 5: 2041731414551661.

648 [31] Wang J, Wang L, Yang M, et al. Untangling the effects of peptide sequences and nanotopographies in a biomimetic niche  
649 for directed differentiation of iPSCs by assemblies of genetically engineered viral nanofibers[J]. Nano Lett, 2014, 14(12): 6850-  
650 6856.

651 [32] Shams A, Eslahi N, Movahedin M, et al. Future of Spermatogonial Stem Cell Culture: Application of Nanofiber Scaffolds[J].  
652 Curr Stem Cell Res Ther, 2017, 12(7): 544-553.

653 [33] Amores De Sousa M C, Rodrigues C a V, Ferreira I a F, et al. Functionalization of Electrospun Nanofibers and Fiber  
654 Alignment Enhance Neural Stem Cell Proliferation and Neuronal Differentiation[J]. Front Bioeng Biotechnol, 2020, 8: 580135.

655 [34] Saino E, Focarete M L, Gualandi C, et al. Effect of electrospun fiber diameter and alignment on macrophage activation  
656 and secretion of proinflammatory cytokines and chemokines[J]. Biomacromolecules, 2011, 12(5): 1900-11.

657 [35] Zheng X, Xin L, Luo Y, et al. Near-Infrared-Triggered Dynamic Surface Topography for Sequential Modulation of  
658 Macrophage Phenotypes[J]. ACS Appl Mater Interfaces, 2019, 11(46): 43689-43697.

659 [36] Chen H, Qian Y, Xia Y, et al. Enhanced Osteogenesis of ADSCs by the Synergistic Effect of Aligned Fibers Containing Collagen  
660 I[J]. ACS Appl Mater Interfaces, 2016, 8(43): 29289-29297.

661 [37] Jin S, Sun F, Zou Q, et al. Fish Collagen and Hydroxyapatite Reinforced Poly(lactide-co-glycolide) Fibrous Membrane for  
662 Guided Bone Regeneration[J]. Biomacromolecules, 2019, 20(5): 2058-2067.

663 [38] Gittens R A, Olivares-Navarrete R, Mclachlan T, et al. Differential responses of osteoblast lineage cells to  
664 nanotopographically-modified, microroughened titanium-aluminum-vanadium alloy surfaces[J]. Biomaterials, 2012, 33(35):  
665 8986-94.

666 [39] Chen Z, Bachhuka A, Han S, et al. Tuning Chemistry and Topography of Nanoengineered Surfaces to Manipulate Immune  
667 Response for Bone Regeneration Applications[J]. ACS Nano, 2017, 11(5): 4494-4506.

668 [40] Mulholland E J. Electrospun Biomaterials in the Treatment and Prevention of Scars in Skin Wound Healing[J]. Front Bioeng  
669 Biotechnol, 2020, 8: 481.

670 [41] Stachewicz U, Bailey R, Wang W, et al. Size dependent mechanical properties of electrospun polymer fibers from a

671 composite structure[J]. *Polymer*, 2012, 53: 5132.

672 [42] Tan E P, Ng S Y, Lim C T. Tensile testing of a single ultrafine polymeric fiber[J]. *Biomaterials*, 2005, 26(13): 1453-6.

673 [43] Giljean S, Bigerelle M, Anselme K. Roughness statistical influence on cell adhesion using profilometry and multiscale  
674 analysis[J]. *Scanning*, 2014, 36(1): 2-10.

675 [44] Miguel S P, Sequeira R S, Moreira A F, et al. An overview of electrospun membranes loaded with bioactive molecules for  
676 improving the wound healing process[J]. *Eur J Pharm Biopharm*, 2019, 139: 1-22.

677 [45] Huang G, Li F, Zhao X, et al. Functional and Biomimetic Materials for Engineering of the Three-Dimensional Cell  
678 Microenvironment[J]. *Chem Rev*, 2017, 117(20): 12764-12850.

679 [46] Zhong S, Teo W E, Zhu X, et al. An aligned nanofibrous collagen scaffold by electrospinning and its effects on in vitro  
680 fibroblast culture[J]. *J Biomed Mater Res A*, 2006, 79(3): 456-63.

681 [47] Chomachayi M D, Solouk A, Mirzadeh H. Electrospun silk-based nanofibrous scaffolds: fiber diameter and oxygen  
682 transfer[J]. *Prog Biomater*, 2016, 5: 71-80.

683 [48] Tian F, Hosseinkhani H, Hosseinkhani M, et al. Quantitative analysis of cell adhesion on aligned micro- and nanofibers[J].  
684 *J Biomed Mater Res A*, 2008, 84(2): 291-9.

685 [49] Lavenus S, Pilet P, Guicheux J, et al. Behaviour of mesenchymal stem cells, fibroblasts and osteoblasts on smooth  
686 surfaces[J]. *Acta Biomater*, 2011, 7(4): 1525-34.

687 [50] Baker B M, Trappmann B, Wang W Y, et al. Cell-mediated fibre recruitment drives extracellular matrix mechanosensing  
688 in engineered fibrillar microenvironments[J]. *Nat Mater*, 2015, 14(12): 1262-8.

689 [51] Franz S, Rammelt S, Scharnweber D, et al. Immune responses to implants - a review of the implications for the design of  
690 immunomodulatory biomaterials[J]. *Biomaterials*, 2011, 32(28): 6692-709.

691 [52] Anderson J M, Rodriguez A, Chang D T. Foreign body reaction to biomaterials[J]. *Semin Immunol*, 2008, 20(2): 86-100.

692 [53] Chu C, Liu L, Rung S, et al. Modulation of foreign body reaction and macrophage phenotypes concerning  
693 microenvironment[J]. *J Biomed Mater Res A*, 2019.

694 [54] Bryers J D, Giachelli C M, Ratner B D. Engineering biomaterials to integrate and heal: the biocompatibility paradigm  
695 shifts[J]. *Biotechnol Bioeng*, 2012, 109(8): 1898-911.

696 [55] Chen F, Zhang Q, Wu P, et al. Green fabrication of seedbed-like *Flammulina velutipes* polysaccharides-derived scaffolds  
697 accelerating full-thickness skin wound healing accompanied by hair follicle regeneration[J]. *Int J Biol Macromol*, 2021, 167:  
698 117-129.

699 [56] Wolf M, Maltseva I, Clay S M, et al. Effects of MMP12 on cell motility and inflammation during corneal epithelial repair[J].  
700 *Exp Eye Res*, 2017, 160: 11-20.

701 [57] Chan M F, Li J, Bertrand A, et al. Protective effects of matrix metalloproteinase-12 following corneal injury[J]. *J Cell Sci*,  
702 2013, 126(Pt 17): 3948-60.

703 [58] Shapiro S D, Kobayashi D K, Ley T J. Cloning and characterization of a unique elastolytic metalloproteinase produced by  
704 human alveolar macrophages[J]. *J Biol Chem*, 1993, 268(32): 23824-9.

705 [59] Daley J M, Brancato S K, Thomay A A, et al. The phenotype of murine wound macrophages[J]. *J Leukoc Biol*, 2010, 87(1):  
706 59-67.

707 [60] Elliott M R, Koster K M, Murphy P S. Efferocytosis Signaling in the Regulation of Macrophage Inflammatory Responses[J].  
708 *J Immunol*, 2017, 198(4): 1387-1394.

709 [61] Huang S M, Wu C S, Chiu M H, et al. High glucose environment induces M1 macrophage polarization that impairs  
710 keratinocyte migration via TNF- $\alpha$ : An important mechanism to delay the diabetic wound healing[J]. *J Dermatol Sci*, 2019, 96(3):  
711 159-167.

712 [62] Usui M L, Mansbridge J N, Carter W G, et al. Keratinocyte migration, proliferation, and differentiation in chronic ulcers  
713 from patients with diabetes and normal wounds[J]. *J Histochem Cytochem*, 2008, 56(7): 687-96.

714 [63] Sahana T G, Rekha P D. Biopolymers: Applications in wound healing and skin tissue engineering[J]. *Mol Biol Rep*, 2018,  
715 45(6): 2857-2867.

716 [64] Babakhani A, Nobakht M, Pazoki Torodi H, et al. Effects of Hair Follicle Stem Cells on Partial-Thickness Burn Wound Healing  
717 and Tensile Strength[J]. *Iran Biomed J*, 2020, 24(2): 99-109.

718 [65] Liu S-D, Li D-S, Yang Y, et al. Fabrication, mechanical properties and failure mechanism of random and aligned nanofiber  
719 membrane with different parameters[J]. *Nanotechnology Reviews*, 2019, 8: 218-226.

720 [66] Da Cunha M R, Menezes F A, Dos Santos G R, et al. Hydroxyapatite and a New Fibrin Sealant Derived from Snake Venom  
721 as Scaffold to Treatment of Cranial Defects in Rats[J]. *Materials Research-Ibero-American Journal of Materials*, 2015, 18(1):  
722 196-203.

723

724



725 **Supplements**

726 **Table S1. Electrospinning parameters of Various Membranes**

| Diameter Group | Solutions                  | Voltage | Distance | Speed       | Time |
|----------------|----------------------------|---------|----------|-------------|------|
| Small(A300)    | PLGA (20% w/v) FC (2% w/v) |         | 11cm     | 0.018mm/min | 8h   |
| Medium(A600)   | PLGA (20% w/v) FC (2% w/v) | -2/5kv  | 16cm     | 0.068mm/min | 4h   |
| Large(A1000)   | PLGA (25% w/v) FC (2% w/v) |         | 16cm     | 0.068mm/min | 4h   |

727

728

729

**Table S2. Sequences of Primers Utilized in the Study**

| Gene            | forward primer (5'-3') | reverse primer (5'-3')  |
|-----------------|------------------------|-------------------------|
| GAPDH(R)        | AGTGCCAGCCTCGTCTCATA   | GATGGTGATGGGTTTCCCGT    |
| GAPDH(H)        | GGAGTCCACTGGCGTCTTCA   | GTCATGAGTCCTTCCACGATACC |
| CD31(R)         | GGTAATAGCCCCGGTGGATG   | TTCTTCGTGGAAGGGTCTGC    |
| CD68(R)         | TGGGGCCTCTCTGTATTG     | TCTGATGTCGGTCCTGTTT     |
| K5(R)           | GCCTCCTCCAGCTCAGTC     | AAGAAGCAGTGTGCCAACC     |
| K10(R)          | TACGAGAAGCACGGCAA      | GGCATTGTCAGTTGTCAGG     |
| IL10(R)         | AGGGTTACTTGGGTTGCC     | GGGTCTTCAGCTTCTCTCC     |
| MMP12(R)        | CTCCCATGAACGAGAGCGAA   | GGTGTCCAGTTGCCCAGTTA    |
| MMP12(H)        | AACCAACGCTTGCCAAATCC   | TTTCCCACGGTAGTGACAGC    |
| TGF $\beta$ (R) | AGGGCTACCATGCCAACTTC   | CCACGTAGTAGACGATGGGC    |

730 R: rat; H: human.

731

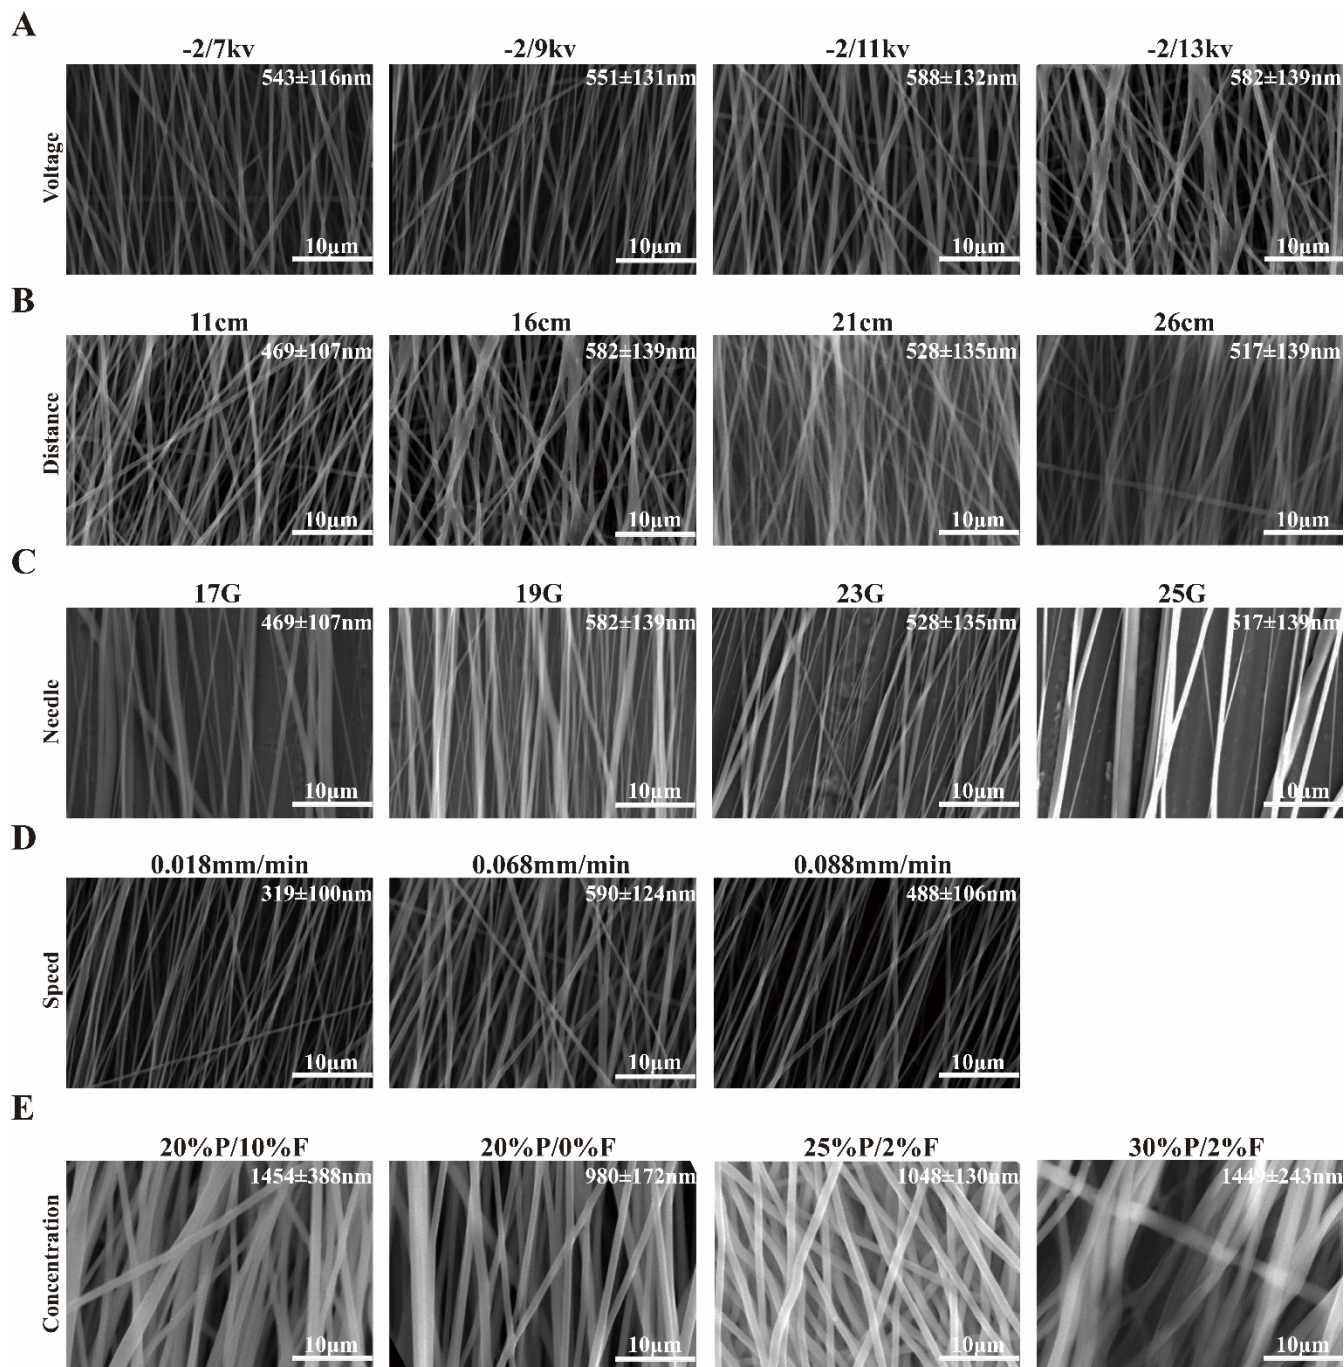

732

733

734

735

736

**Fig. S1.** The diameter of the electrospinning fiber could be changed by adjusting (A) the voltage, (B) the distance from the tip to the collector, (C) the inner diameter of the needle, (D) the injection rate, or (E) the concentration of the solution. P: PLGA, poly (lactide-co-glycolide); F: FC, fish collagen.

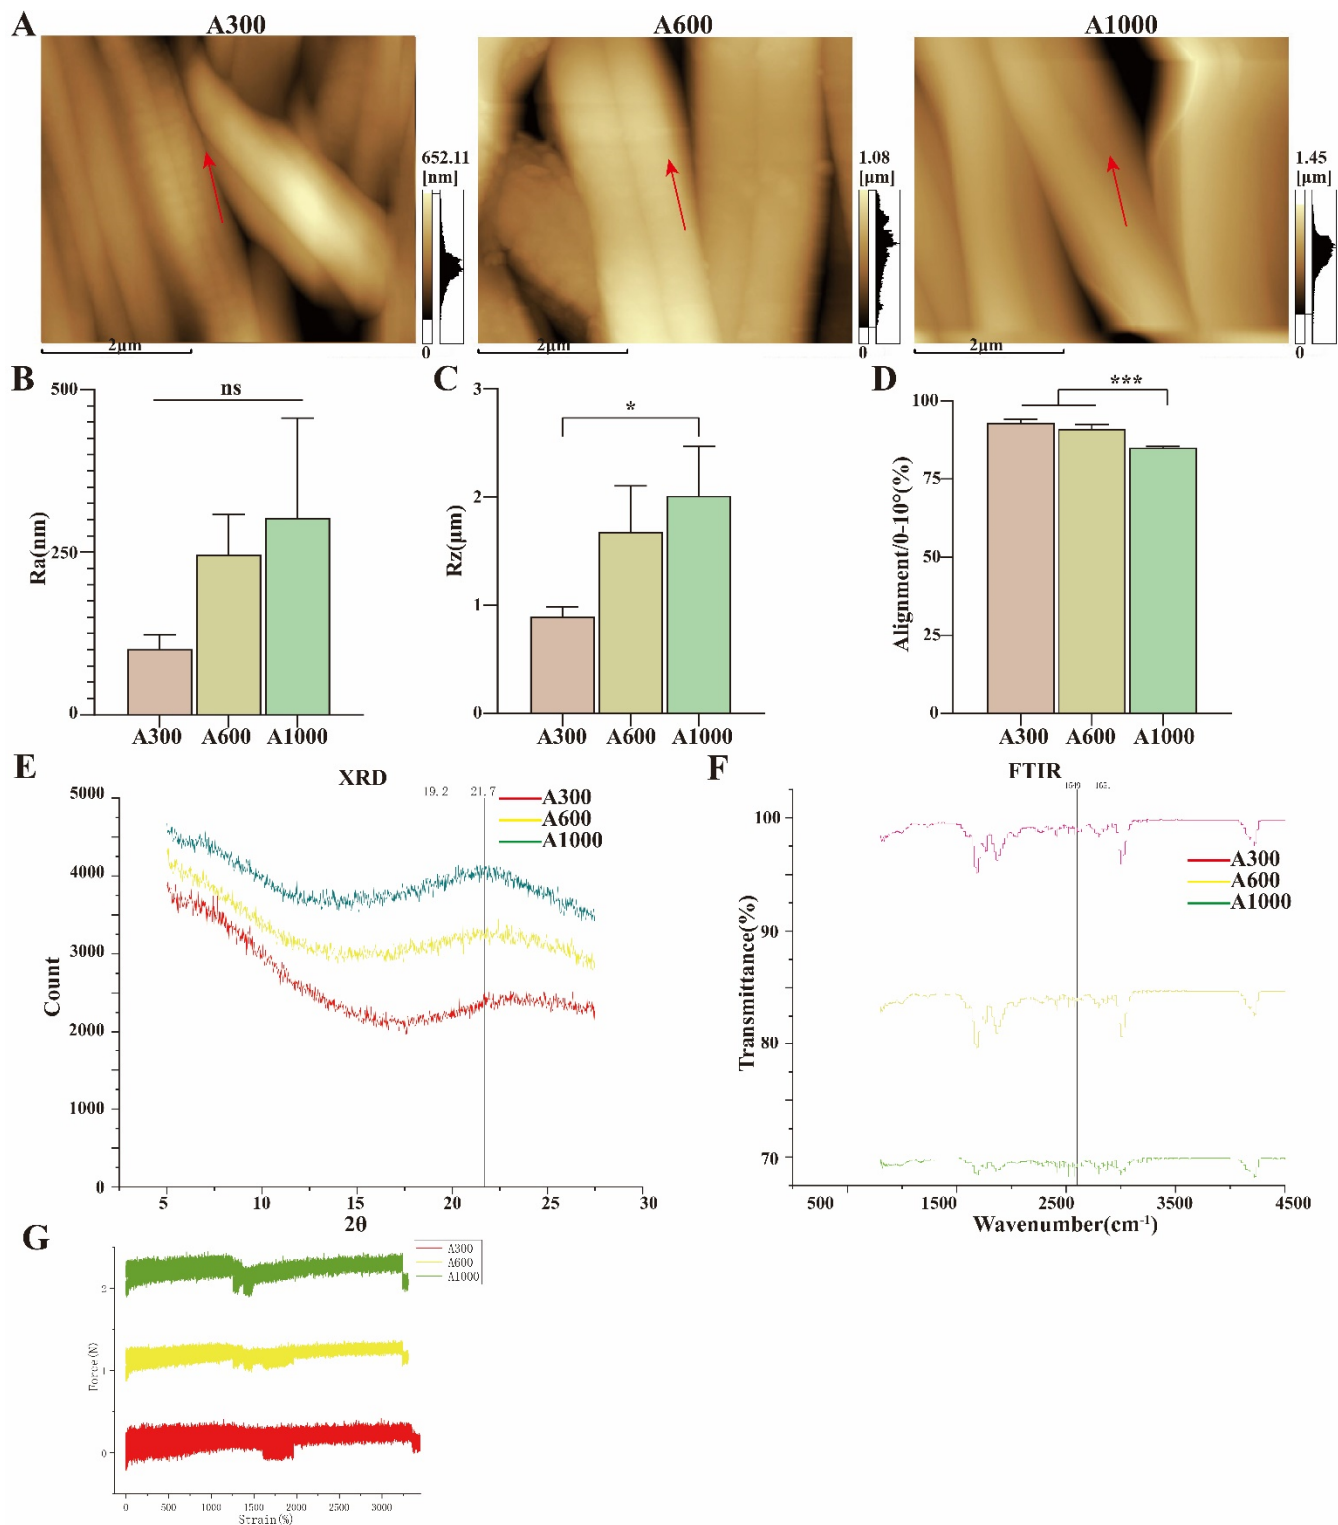

737

738 **Fig. S2.** (A) AFM images and (B-C) corresponding roughness analysis of different diameter aligned electrospinning

739 membranes; (D) Alignment analysis of various membranes; (E) XRD patterns of various membranes: the results show there

740 is no special peak, indicating that there is no special crystal formation; (F) FTIR spectra of various membranes: the  
741 absorption of amide I and amide II in FC appear at  $1651\text{ cm}^{-1}$  and  $1549\text{ cm}^{-1}$ , respectively. Those absorption peaks in  
742 FC/PLGA (A300, A600, and A1000) have a weak shift, appearing at  $1650\text{ cm}^{-1}$  and  $1561\text{ cm}^{-1}$ , respectively, indicating that  
743 the amino group in the FC most likely has hydrogen bonding with the PLGA molecular chain. (G) Typical stress–strain  
744 curves of various membranes (perpendicular to aligned membranes).  $*p < 0.05$ ,  $**p < 0.01$ ,  $***p < 0.001$  by ANOVA for data  
745 in (B), (C), and (D). The ns showed no significant difference.  
746

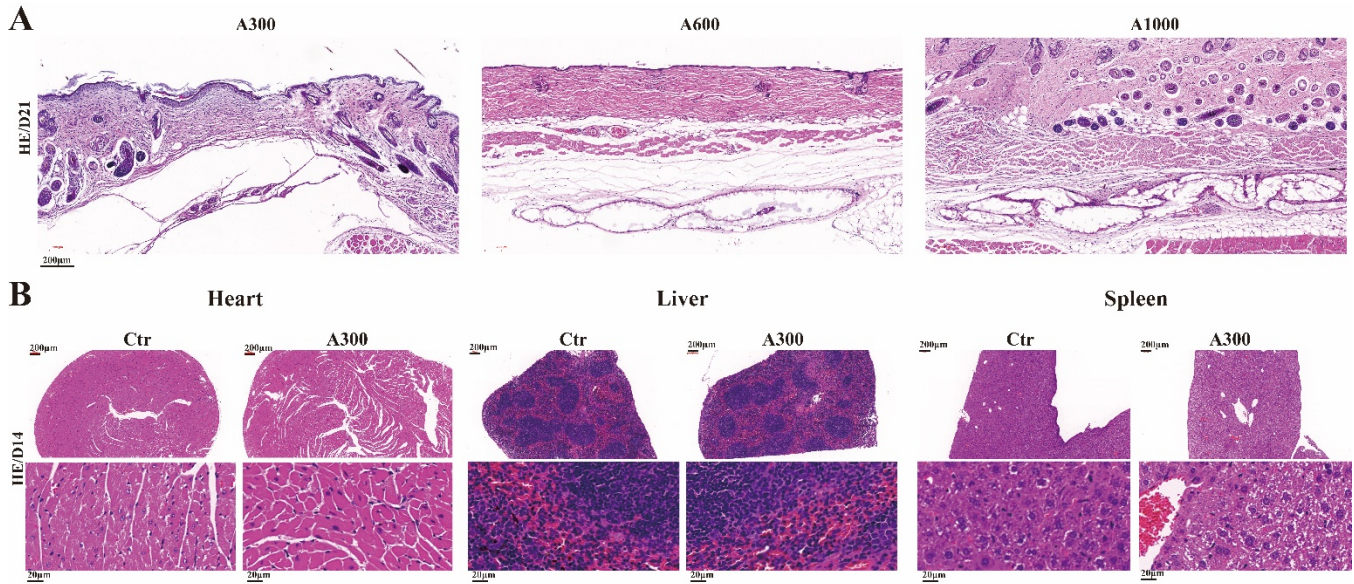

747

748 **Fig. S3.** (A) H&E on the membrane degradation A300, A600, and A1000 on day 21; (B) H&E on hearts, livers, and

749 spleens of rats from the control group and from the representative A300 group on day 14.

750

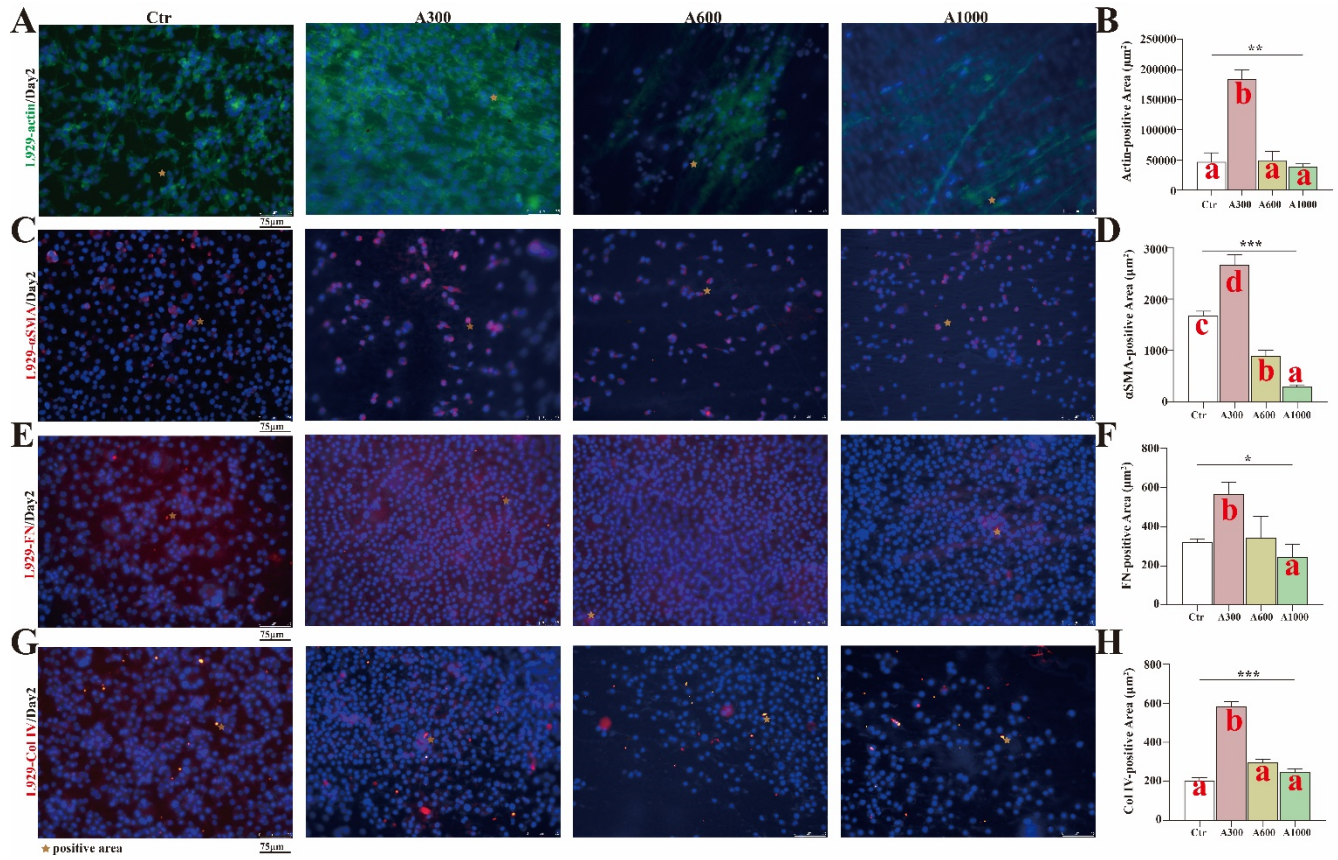

751

752 **Fig. S4.** IF staining of fibroblasts on different diameter aligned membranes. (A) Actin (CA1620, Solarbio) expression and (B)

753 corresponding analysis; (C)  $\alpha$  smooth muscle actin ( $\alpha$ SMA, AF1032) expression and (D) corresponding analysis; (E)

754 Fibronectin (FN, AF5335) expression and (F) corresponding analysis; (G) Collagen IV (Col IV, AF0510) expression and (H)

755 corresponding analysis. \* $p < 0.05$ , \*\* $p < 0.01$ , \*\*\* $p < 0.001$  by ANOVA. Different letters indicate significant differences.

756

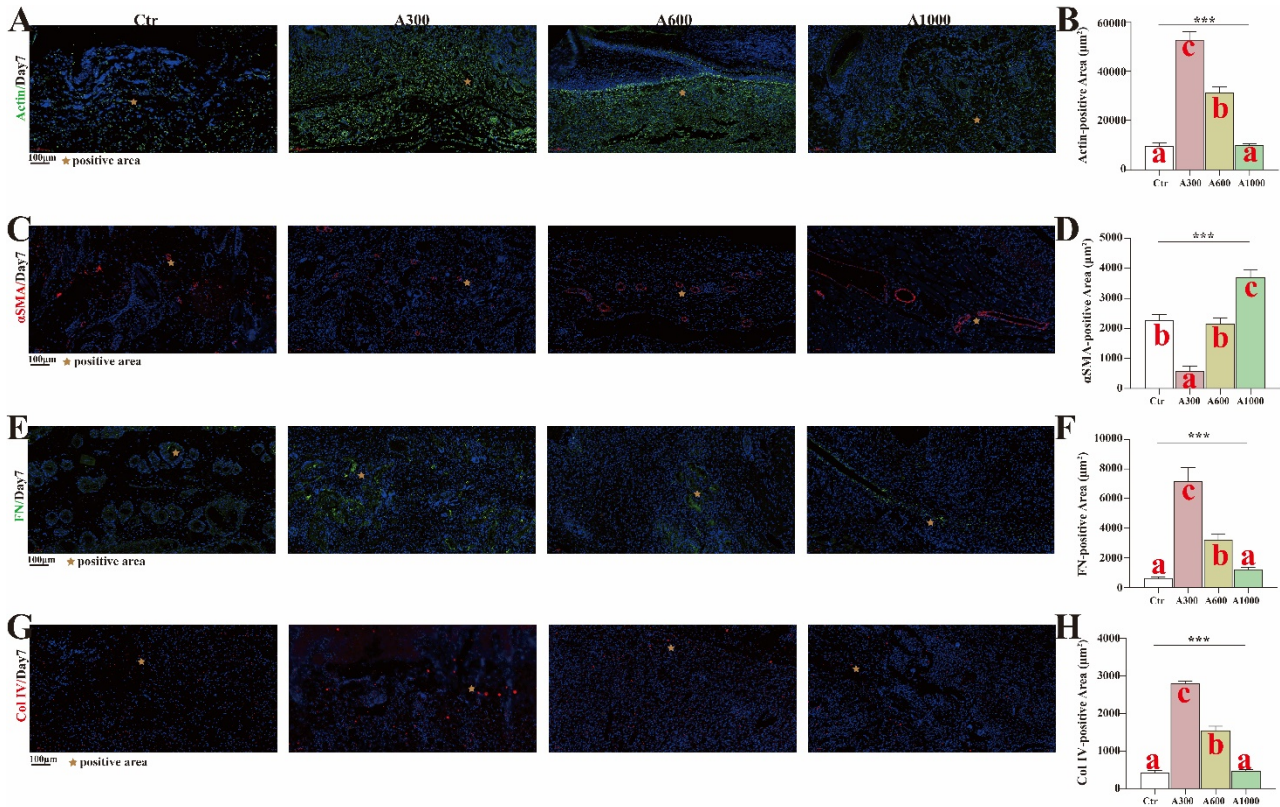

757

758 **Fig. S5.** IF staining of rat wound defects implanted with different diameter aligned membranes. (A) Actin expression and (B)  
 759 corresponding analysis; (C) αSMA expression and (D) corresponding analysis; (E) FN expression and (F) corresponding  
 760 analysis; (G) Col IV expression and (H) corresponding analysis. \* $p < 0.05$ , \*\* $p < 0.01$ , \*\*\* $p < 0.001$  by ANOVA. Different  
 761 letters indicate significant differences.

762



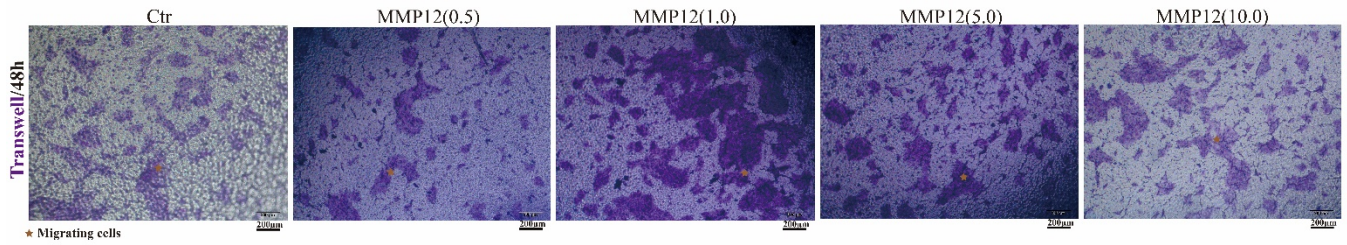

763

764 **Fig. S6.** Screening for the optimal concentration of MMP12 for keratinocyte migration.

765

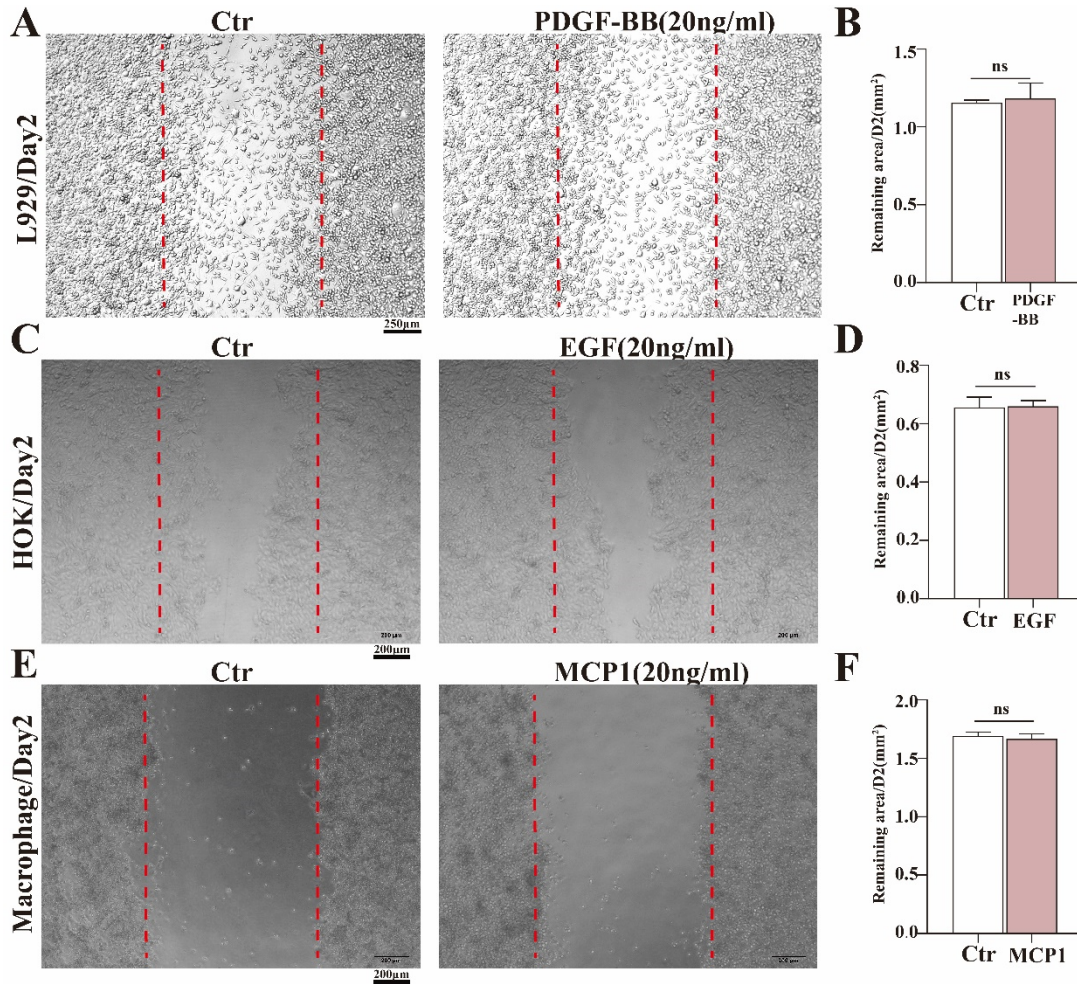

766

767 **Fig. S7.** Growth factor/chemokine-induced migration experiments. (A) Fibroblast migration induced by PDGF-BB and (B)

768 corresponding analysis; (C) Keratinocyte migration induced by EGF and (D) corresponding analysis; (E) THP-1 cell

769 migration induced by MCP-1 and (F) corresponding analysis. The ns showed no significant difference by analysis of

770 unpaired t-test.

771

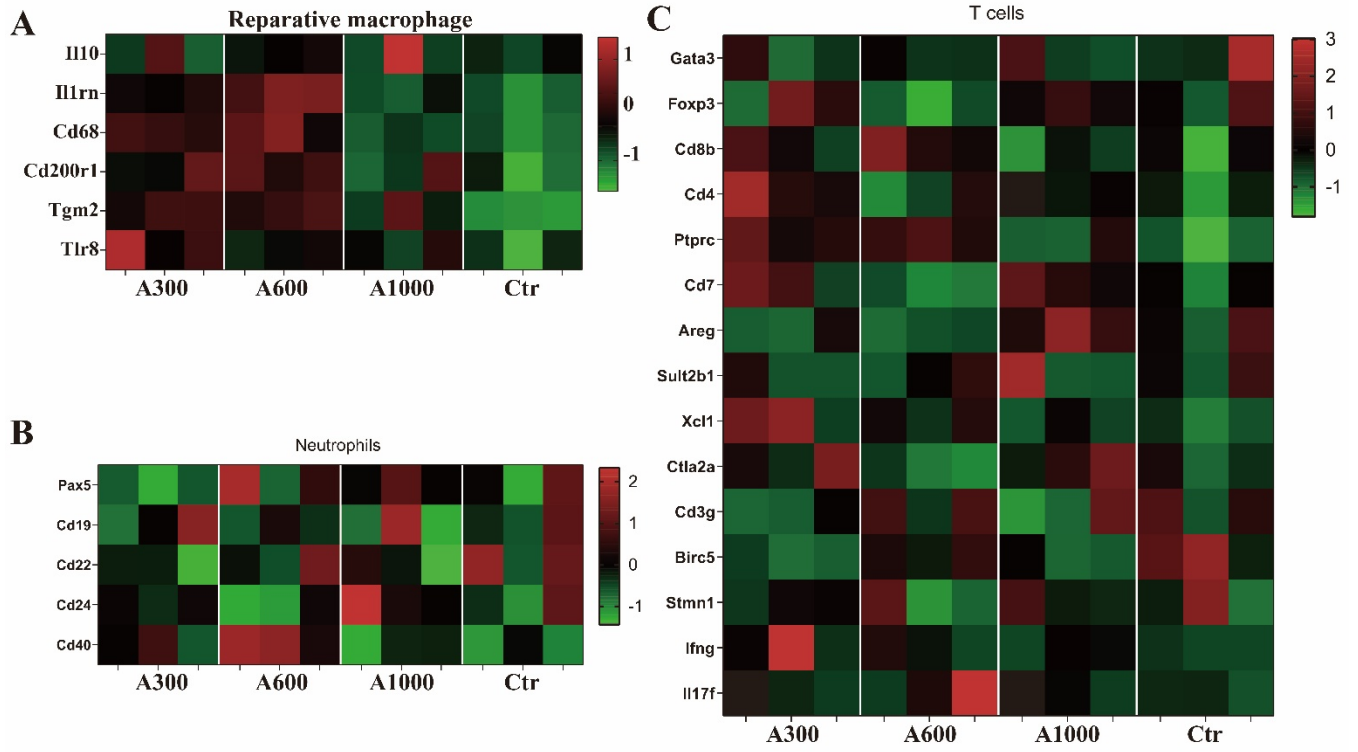

772

773 **Fig. S8.** Gene changes of reparative macrophages, neutrophils, and T cells in Bulk RNA sequencing.

774

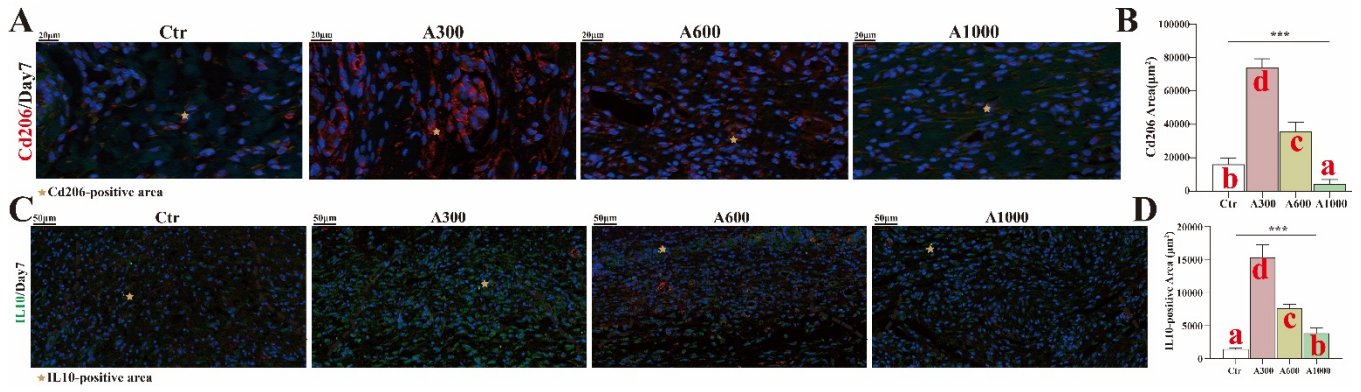

775

776

777

778

779

**Fig. S9.** (A) Cd206-positive images of IF staining of rat skin defects and (B) corresponding analysis; (C) IL10-positive images of IF staining of rat skin defects and (D) corresponding analysis. \* $p < 0.05$ , \*\* $p < 0.01$ , \*\*\* $p < 0.001$  by ANOVA for data in (B) and (D). Different letters indicate significant differences.

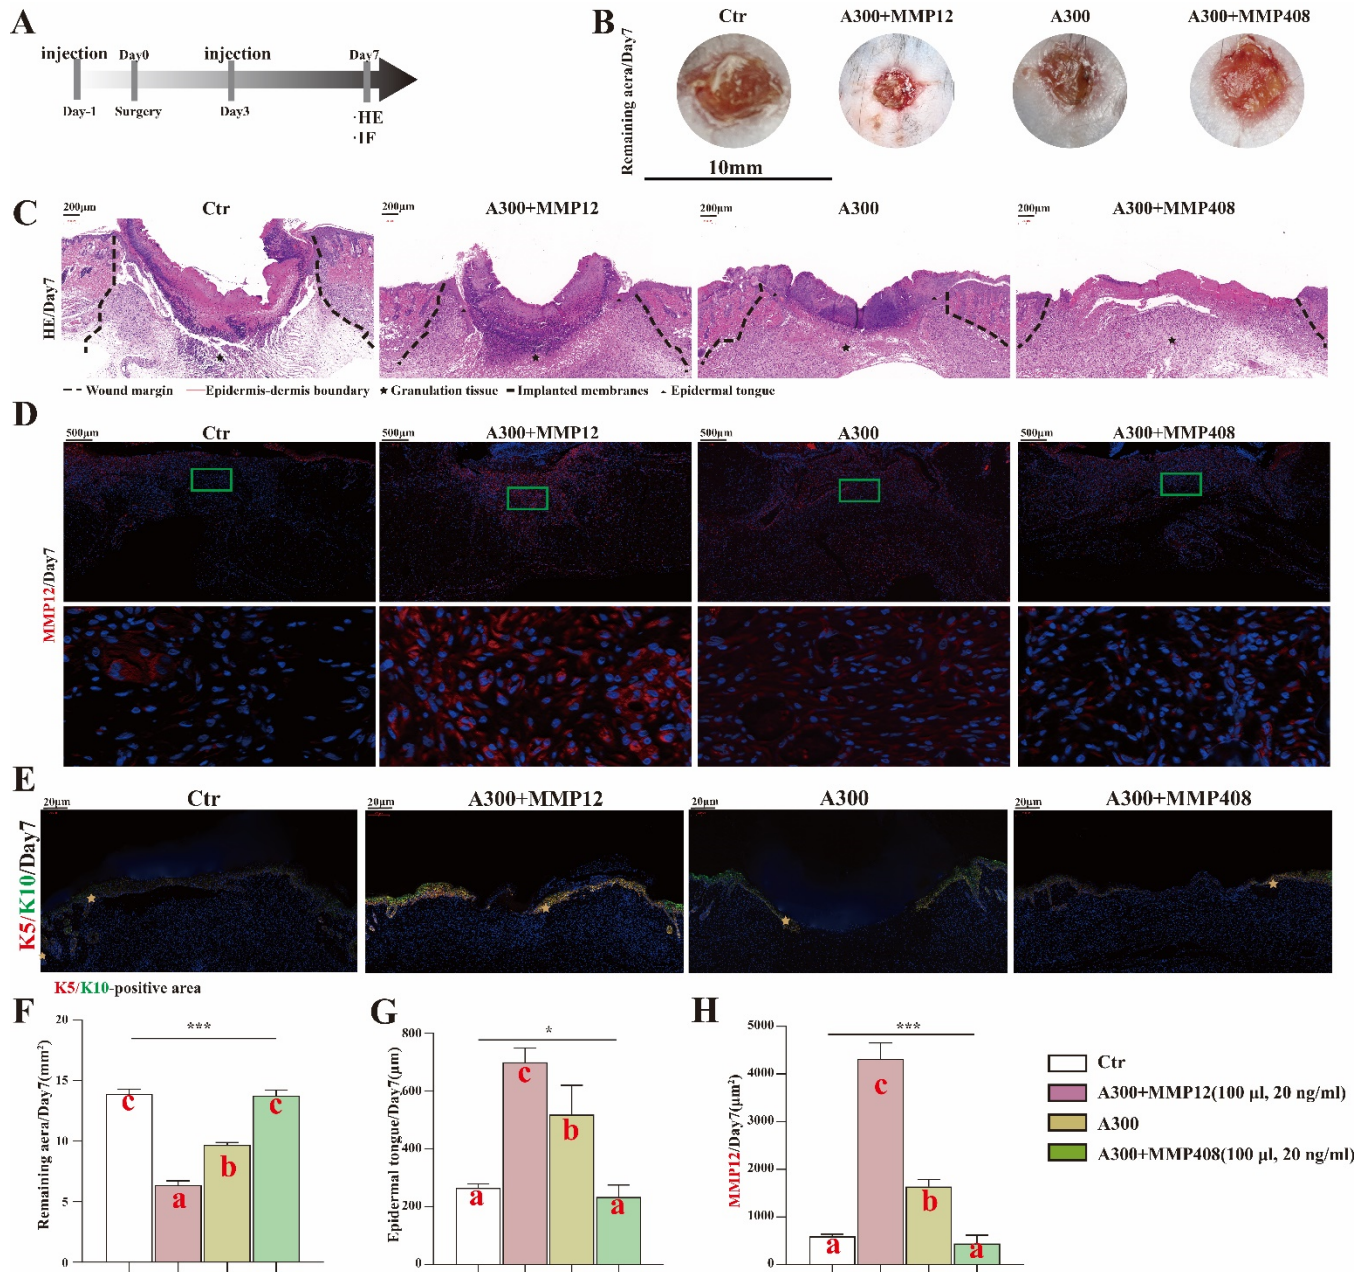

780

781 **Fig. S10.** (A) Workflow for verifying the function of MMP12 in mice; (B) Macroscopic images of mouse skin defects and

782 (F) corresponding analysis; (C) Residual gap images of H&E of mouse skin defects and (G) corresponding analysis; (D)

783 MMP12-positive images of IF and (H) corresponding analysis; (E) K5/K10-positive images of IF. \* $p < 0.05$ , \*\* $p < 0.01$ ,

784 \*\*\* $p < 0.001$  by ANOVA for data in (F), (G), and (H). Different letters indicate significant differences.

785

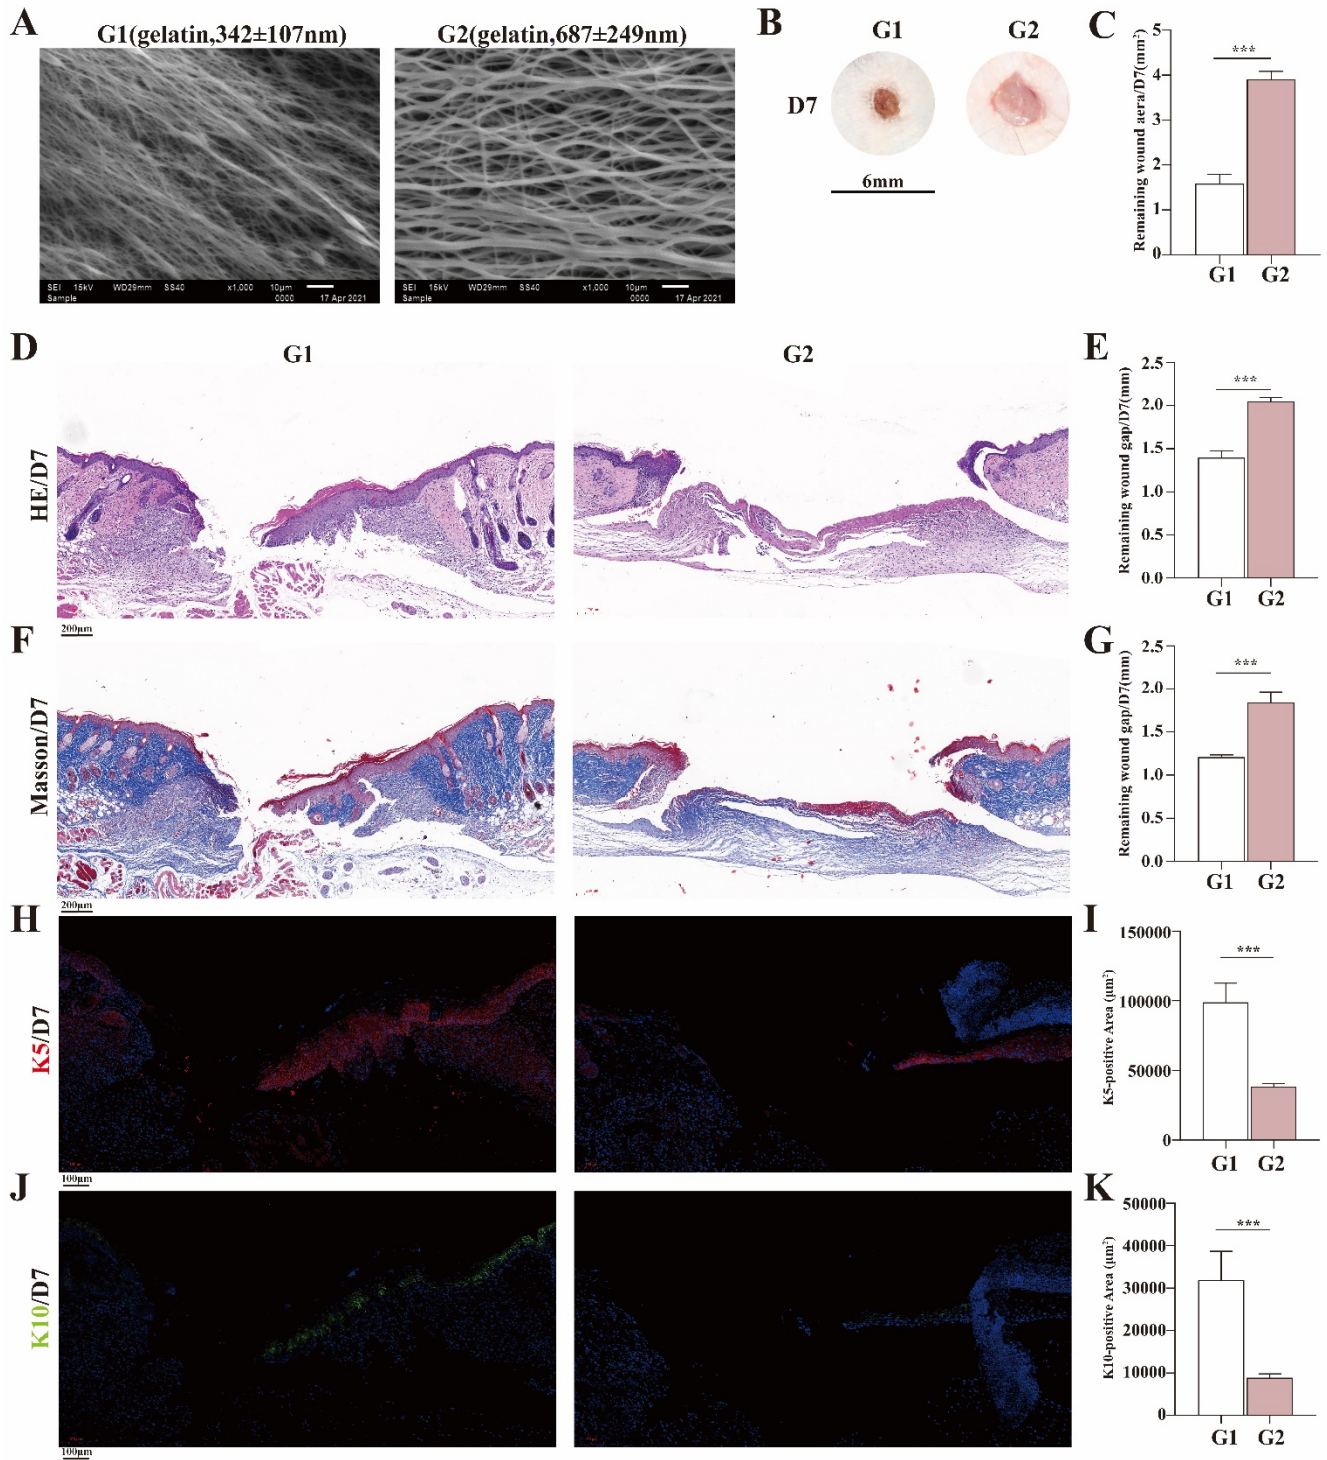

786

787 Fig. S11. (A) SEM images of small (G1, 342 ± 107 nm) and medium (G2, 687 ± 249 nm) diameter aligned gelatin  
 788 membranes; (B) Macroscopic images of mouse skin defects implanted with different diameter aligned gelatin membranes and  
 789 (C) corresponding analysis; (D) Residual gap images of H&E of mouse skin defects and (E) corresponding analysis; (F)

790 Residual gap images of MST staining and (G) corresponding analysis; (H) K5-positive images of IF and (I) corresponding  
791 analysis; (J) K10-positive images of IF and (K) corresponding analysis.  $*p < 0.05$ ,  $**p < 0.01$ ,  $***p < 0.001$ . Different  
792 letters indicate significant differences by analysis of unpaired t-test.

793
